# Supplementary material for: Complete Genome Analysis of a Novel Shewanella Phage vB_Sb_QDWS
Source: Research Square preprint supplement (doi:10.21203/rs.3.rs-906669/v1), 2021-10-05
Supplement: Supplementary file 2 [file fde99356b32c92298b9280f2.docx]

>vB_Sb_QDWS

ATGACCGACAAGAACGTTCTCCAGATGACCGCCGACACCATCGGCAAAGACCTGCTTTCC

GCGCTCGTGACCGAGCTGAAGCTGCTTCCCGATGTCTGGGTGAAACTGTCCGAGAAGAAG

CAAAACGACGTCATCGACCGCCTGCGCTCGCGCGTCGAGCACAACGTGAAGATGGCGACG

CACCTGATCGCGAGCAACGGCCGCACGGTCGTGGCCGGCGACCTCGAACAGATCACGATC

AAGGATGGCGTGAAGGCGGTCGTGAAGTTCAGCGGCGCCGCGCCGAACCTGCACGAGCTG

TACGACGCGAGCGGGAAAGCGGTCCTGGTCGTCGTGGCGAATCCGGACGAGCACACCGGC

GGCATGGATGACGTGCGCGGCGAATCGGATCAGCGCGGGTTCGATCTCGGCCGCGAATAT

ACCGACGACGATGGCGACGGCATGGACGGTCCGACCGATGTTGTCGACGTCGATGCACGC

GAGCTGCCGCAACTCGGCGACGGTCCGACGCAGGCGCAGCTCGACGAGCAGTTCGAGGCC

GGACGCCACGCGGCCGAGGAAGGCGTGCCCGAAAGCGAATGCCCGGTCATGCGCGGCGAA

CTATGCATCGCCTGGGTGAAGGGCTGGAAGGCGTGGCACGAGGAACATCCAGCCGATGAT

GAAGAGGAAGTTCAATGAGAACCGACATCGAAACCTACCTCGGAACGGTCACCGCTTCCA

CCGCGAAGAAGATCTCGACGAACGTCGGCCTCGATCAACTCAGCGTCGCCAAGGAACTGA

ACCGGATGCATGCCGATGGTGTCGTCGAGCGCGAAAAGCGCAACGGCAACGAGTACGCGT

ACTGGCTTGTGCGCGGCAAGCAGGCGGCACCGGCCGCTGCTGAGAACGTGCCGATGGCGG

TCGCGATCGTCGAGCGGTCGGTGGATCCGGAGACGAAGGTGATCGGGACGGCGGAGAGGG

AGGCTCAGTCGACCATGGCGAGACTCGCATCCGAGATGATTTCGTCGGAAGTGCTCGAGC

TGCTGAGCATTCTCGATCTGCCGTCCACGCTGACGATCGCGATTGAGGTGGCGCGTGAGC

GTGCCCAGACCGCCAAGGAAGGCCGTGCTAAGCATCAGCGCCTGCTCGCCGAAGTCGAAT

CGCTGAATGAAGTGAACGCCCGCCTGAAGGCCAACAACTCCGATCTCGAAAAGCGCATCG

ACTCTCTCAGCGGCGATGTTCGGCCGCTCGGGTCGATGTTCGTCACCATAGGCCGTGAGG

CGAAGCCCATGCGCCACGCGACGATCGAAAAAGCGCAGCGCCGTGCGTCGACCCTCATCC

GGTCGGAGCGGGAATCCGAGGTGCTCGTGCTCGAACCAATCGGCCGCATGGTGCGCGGCA

GCGAGTGGCGCACGCGGTGAATGTTCACGGGCCGGCCGCGCCGGCCCTCCTTCCCTAGGT

CTCAACGGTGGGCGCTTGGTGTGACGGGTGGGCGCCGTCACTGCCCCGACTCGACTTCCG

GCGCTTTCATGCTACCCCGCCGCCTTATGCGAGCCGAGCGCCCATCGTTGCGACCAGTTG

TTCTACATCATCCAGGAGAAACCATGCAACAGATCCAACTCCCGCCGCTCGCCGAAGGCG

AGGTCTATCTCGGCGGTTTCGTCAACGCCACCGGCGACGTCGAGCACGTCATCCTCCTGC

CCGGCGACATCCGAGCGACGTGGCACAAGGCCAAGGAATGGGCCGAGGGCCTCGGCGGCG

ACCTGCTGAACCGCTACGAGCAAGCACTGGCATTCGCCAAACATCCCGACCTGTTCGAGA

AGGCCGCCTACTGGTCGAACACCGAAGACGCTGAAGATCCCGGCTGGGCGTGGTGCCAGT

ACTTCGGCTTTGGCGACCAGTTCAGCCTCCACCAGGGCGACGAGTTGCGCGCCCGCGCCG

TCCGCAGATTGTCCATTTAACCCTTCATCTATTTCCCAACGGAGCAAGCAATGACGATGA

CGATCACGCTCGAACAGATCGAGGCGGATCACGCGCGCATCGGCGCGATGATCGACGAGC

TCAAGAAGCAGCCGCGAGCGACCGAGCACCACGTCGACGCGGTGACGATCCCGCTCGCGG

CCGGCGAGAAGATCGCCGGGCAAATCCTTCTCGACGACGGCTCGCTGAGCCACTACCTGA

TCCTGCTGCCGGGCGACGCCGAAGATCTGGATTGGGAGGCGGCGAAAGCGTGGGCGGCCG

AGCGAGGCGGCGAATTGCCGACGCGCCGCGAGCAATCGCTCCTGTTCGCCAACCTGAAGG

GTGAATTCGAGTCGGCCTGGTACTGGTCCGGTGAGCGCCACGAATCGAATTCCGGCTGGG

CGTGGTACCAGCACTTCCTCAGTGGCACCCAGTGCTACAGCCGCCAGAACTACGAGTTGC

GCGCCCGCGCCGTCCGCAGATTTATCCCTTCAGTTTTTTGATCATTTAATCCACCGTGGC

CCTGCACAACCAACTCCCGATATATCGAGCGGCCTACGGGCTGCTCGATGACGTCACCAA

TCTGGTCAAGAACATGCCCCGCGACTTCAAGCGCAGCATCGGCGAGAAGATCAGCGCGGA

GTGCATCGAGATCATGGTGTTGGTGTTCCGCGCGAACGTCGCGGCCGACAAAGCGCCGCA

CCTCGTCGAATTGCTCGAGCGCCTGCAGGTGATCGAGCTACTGCTTCGTCTCAGCATGGA

CAAGCGCTTGATCGCTCGCGACGGTTACGCGATGGCCATCGAGAAAACAACGAGCATCGG

GAAGCAGGCCAACGGCTGGAAGAACGCCGCAAACCGTCGCCCGCTCCGCTAAGGTCAAGG

CCTTCGCGGCTGAGCGATAAATCAATCTGGTCGTGCCGCTGGCCCACAAGGCCACCGCCA

TGCGCAATGAGGAAACCGGCCGCCGGTGTGCGGATAGGTCCAGCGCAGTTTCCCGACTGA

GAAATCGGCCGGGCGACGTAGATCGCACGATACATCCGGCTGGGCGTGGTACCAGAACTT

CAACAATGGCAACCAGAACAACAACCACCAGAACAACGAGTTGCGCGCCCGCGCCGTCCG

CAGATCGAGGGCCATTTTCGTTTGCCGAGCTGGTCGAAGCGTATCTCGACTGCCGGCGAA

CGAAGCGGAACAGCAATGCGGCGCTCGCGTTCGAAATGCGGCTCGAACGCAACCTGCGCC

GACTGTACGACGAGCTGGTCGATGGCAGCTACATGCCCGGCCGCTCGAAGTGCTTCGTCA

TCACGAGACCGAAGCCGCGCGAGGTTTGGGCGGCAGCGTTTCGCGATCGCATCGTGCACC

ACCTGCTTTACAACCGGATCGGCCCGCGCTTCGAGCGGTCATTCATCGCCGATTCATGTG

CCTGCATCAAGGGGCGCGGCACCCTATACGCCGCGCAGCGCCTCGAATCGAAAGTGCGCT

CGATCACGCAGAACTGGTCGAAGCGCGCGTTCTATCTGAAGTGCGATCTCGCGAATTTCT

TCGTCAGCATCGACAAGTGGATTCTGCTCGAGCTGCTGCTCGCGAAGATCTCCGAGCCGT

TCTGGCGATCGCTGACCGAAACCGTGCTGATGCACGATCCACGGGGCGACTACGAGTACC

ACGGCGATCCCGCCATGATGGACCTCGTGCCGCCGCATAAACGGCTGCTCGAACAGGTGC

CGCACCTCGGGCTGCCAATTGGCAACTTGTCGTCGCAATTTTTTGCGAACGTCTACCTCG

ACGTCCTCGATCAGCGCGCGAAGCATGTGCTCGGCGCACGGCACTACGTTCGTTACGTCG

ACGACTTCGTGTTCCTTCACGAGTCACCGGCGCGGCTGAACGAGATCCTTGCTGATGTGA

CAGCGTTCCTGCCTGACCGCCTCGGCGCGCAGATCAATCCGCGCAAGACCATTCTGCAAC

CGATCGACCGCGGCATCGACTTCGTCGGCCAGGTCATCAAGCCGTGGCGCCGGGAGACGC

GGAAGCGAACGCGGAACGAAGCGCTGCGGCGTGTGGCGGCAACGCCGGCCGCCGACCTGA

TGCAAGTCGCGAATTCGTATTTTGGCCTGTTGCGTCAGGCGACCGCCAGCCATCAGGACC

GCGCGCAGCTCGCGAACCTTCTTCGGTCGCTCGGCAAAGCCGTCGACCGCGACCTTACCA

AGACATTCGGCCGCCAGACGCATGGCAGCCGAGCACCCAGCCATTGAGGCTTGATCTACT

GATTTAGAGGGTGCGACCTTGAACTGGATCGACCAATCCCACCGCGGCGACTGCCGCGAC

CTGATGCACTCGATGATCGCAGACGGCGTGCGCGTGCAGACGATCGTCACGTCGCCGCCG

TACTGGGGACTGCGCTCGTACCTGCCTGACGGCCACCCAGACAAGGCGCGCGAGATCGGA

CAGGAGCCAACGCTGCGCGAGTTCATCGACACGCTGGTCGGTGTTTTCGATCTAGCGCGC

GAGCTGCTTGCCGATGACGGCACGCTCTGGCTGAACATGGGCGACGCCTACGCCGGCTCG

TGGGGTGCGCAGGGGCGCACGGGTCAGATGTCGGACCGTTCGGTGATAAGCGCGCAGCAG

ATCGCGGCCGCGCAGCATCGGACTAGCGGGACGGGCTCGCGCGATCGCACCGGTCTGAAG

CCGAAAGACCTGATGGGCCAGCCGTGGCGCCTCGCGTTCGCGCTGCAGGACGCCGGCTGG

TATCTCCGGCAGGACATCATCTGGCACAAGCCGAACCCGATGCCGGAGAGCGTGCGCGAC

CGCTGCACGAAGGCACACGAATACCTGTTCCTGCTCAGCAAGAGCGAGCGGTACTACTTC

GACCAGGCCGCGATTCTCGAACCGGTCAGCCCGAACACGTACGCGCGCCTTTCGCAGAAC

GTGCAGGCTCAGATCGGCAGCGAGCGCGCGAACGGCGGTGCGAAGACGAACGGGAACATG

AAAGCGGTCGGCCGCAAGGTCTATCCCGGCAACGGCGTTGGTTTCGGCCACGGCTTCGAC

GCGGTACCGAAGGGTCGCGTGAAGAACAACGCCAGTTTCGACGAGGCGATGGCGATCATG

CCGACCGAGCGCAACCGCCGTTCCGTCTGGACGATCCCGACGCAGTCATACAGCGGTGCG

CACTTCGCGACGTTCCCCGAGGCGCTGGTCGAGCCCTGCGTGCTCGCTGGCAGCCGGCCG

GGCGACGTCGTGTTCGATCCGTTCTTCGGCAGCGGCACGACGGGCCAGGTGGCGCAGCGG

CTCGGTCGCCGTTTCCTCGGCTGCGAATTGAATCCCGACTACGAAACCCTGCAACGCGAC

CGGCTGCGCCAGCCGGGGCTCGCGCTCGCCTGACCACCTGAGGACCACACCATGACCACC

ACCGACACGCCGCGCGCCGCCGCATTGGCGGCCGACCAAGGGCCGTGGCGCGAGCTCGCG

CGACGTCTGTACGTCGAGCTGTTCCACTGCGATCTGCAGATGCGTTCTACTCGCGATGAG

GATGGCGAGCCGCATTGGACGCAAAGCGTGGTCGTGCGCGACGTCCTGGCGGACGCGAAG

GCCGCGCTCGATGGCGCCCCGCAGCCCGCGCAGGCAGACGCTCGGGTCGGGCTGACGGAC

GAGCAGATCAACGCGATCATGGAACAGGCGCAGGTGTTTGCGTCGGCGTGGTCACTCATC

GGCGGGATATTCGACAACGGCGATGCGCAGGTAAATGCTGAGCAGGAGAGATCCGATCTC

CGCGAACTTCTTAAAGGAGCTAACCATGGCTGACCACATTCTTCCATACGGAAGCGCATT

CTTTACTGCATCGCTTCCGCTTCCCGCCGACCATTGGCTGTATGCGCCGCGCTGCGCCGA

GTGGGACAGCGAGCGCGATACGACGGCGGATACACCGCATCCGATCCTCACGCACGCGCA

ACGAGATGCCGTCGTCGCAGCTGTCCGCTATGCAATCCGAGGCGCGACGATGTGCGGTCA

GGAACCCGACTTTGATCCGGACGCCTTGGTGCAGAACGCCGTCTATGCGCTTTGCGGCCC

TTTCGGTTTCGAGATAGCCAACGATGCCGAATGACAACGTGCTGACGGAGCGTCAGCGCA

TGGACTTGCTGCTCGTTGCCGACGATATGTCTGTCAGCGGGGACGCGAAGCTTGCAGATG

CGCTGCGCGCCCTTCTCGCCGCCCATCCGGGCCAGCCGGAGCCGCGTGACGCGATCGCAC

GTTCGAAGCGCATCCTCGCGCTGGTCGATGAGTATCACGAGAACCCGACGCGCGACACGC

GAACTGCACTTCGAGTCGCGCTGATGGACGAGTTTCGGCTGGAGCCGCGCGCCGAGGTGA

CGCGCGAACCGAGCCCCGACTGGATGACGTGCGAATCGCGCCGACCGTTTGTCGTGAACA

GCATTCGCGCACGCGTCGCGGAACTGCGCGACGCGGAGAAACGCTGCCGGAATGCGTACC

GCAAGGACTTCATGGGCGTCCCGGCGCGCTATGTCGCGGATGCCTACGGTGAAGCTGCTG

CGGCACTCGAAGCGCGGCTCGTCGCCATCGACGCCGCCCGCGCAGGAGACGCAGCGTGAG

CACTCGAAAATCCATTCCTTCCGAAGATCGCGTGATCGGCGCGATGATTCCCGGGCATGT

GATTTCCCCTTGGGAGATCGCAATTCGCATTAGCTCACTGGCCGCGCTCGTGCGACCAGT

GATGGAGGGGCTCGCGGATCGAGGCGCGCTCACGCGCGTGCGAGTTTCTCATGTGAAGCA

GCCGAAATACATGATCACTGGAACCGAGAAGCTCGTCGAGAAGGTCGAGAAATATGTCGG

CATTCCAGCCGGGGCACGCCTCGCACCCAATCTGCAATCCACGCTCGCCGGCTACGATCG

AGAGATCAGCCGCCGCGTCGAGCTCGCTTTGGCCACGAGGGGAAAATGACCGACTCAGAT

ATCGAGCAGGACGAAACCGCCCTCACCCTTCAGCAGGTTGCCGACCGCCTGCAACTCTCC

TACAGCACCGTATTCGCGATGCGCAAGCGGATCGGTTTTCGAATGCCCGGATCCCGCATC

TGGCGCGTCTGGCCCTCGCGGCTTGCCTCTCTTTCCGAAAAACGCAACAATCTGACCCGG

CTATCGCTGCGGGTCGGTGGAGATAATGCATGTCAATCCGCAGACGTAAAGGCTCCGGGG

TTTGGTTTATCGACCTCCGCGCGCCAAGCGGCGAAAGAGTTAGACGCTCTACTGAAACAA

AGGACCGGCGCGCCGCGCAGGAATACCACGACCGGTTGAAAGCCGATCTGTGGAGGCAGG

ACAAGCTCGGAGAGGTGCCAGATCGCACTTTCGATGAGGCGGCGCTTCGGCTCCTGAAGC

TGTGTGAAGGTCAGCGCGACTATGCCGGGAAACTCCGGCACGTCGCATATTGGACCGGGC

AGTTTGCCGGACGCTCGATGCGGACCATTACGGCCGACGAGATCTTCGATGCGCTGCCAA

CGCATCGGCTGATCAAAGGTAAGCCGGCGCGGCCGCTGGAGCCCGGAACGCGCAATCGAT

ACGTCAATACGATTCGGCGCCTGCTGAATCTGTGTCTTGAATGGGGATGGATCGATCGCG

TGCCGAAGCTTCAGCGATTTGAAGAACCGGATGTTCGGGTGCGATGGGAGTCGCCGGAAG

TAATCGCCAAGATGATCAACGCGTTGCGCCTACCGTGGATGCGTGACGCGGCGATCGTAG

CCGTAGCGACCGGGATGCGCGAGTCCGAGCTGTTCGGCCTGCGCGTCTCGCAGCTCGATC

TCGCGCAATGCAACGCGTGGATCACACATGAAGGCGCGAAGTCGAAGCGCGCGCGGTCGG

TACCGCTGAACGAGGATGCGATGAGCGTTCTCGCGCGGCGGGCCCAGACGGCGACGGATC

TCGTTTTCACGCGCGGGTACACGCGCGGCGACGGGCCGCCAAAGCTGATCGGGCAGATCG

ACAAGCGCGACTTCGCGCAGGCGTGCAAGACGGCCGGGATGGTCGACTTCAACTGGCACG

ACCTGCGGCATACCTGGGCAAGCTGGCACGTGCAGCGCGGCACGCCGCTGATGGTGTTGA

AGGAGCTGGGCGGCTGGGAGACGATAGCGATGGTGCAGAAATATGCGCACCTCGCACCGA

GCCATCTGGCGCAGCACGCCGGGACGGTCACATTTTGGGCGCAGTCGGCCGAGCAGAAAG

AAAAAACGCCGCTGTCGGAAGCGGCGCAATCCCTTGCTGCATAAGGCTTTTAGCTGGCCC

GCCCTACACGATTCGAACGTGTGACCTACGGCTTAGAAGAACGGCAGTTTGAAAATACAT

GGGAACGAAAGCGCAGTCAAATCAACGACTTAAAGCGATAGCCACCCCTAAGCAGGCTAC

GCTTTCGCGCCCATTTTAGCCATTTCGCAGGCATTCGGGGCGCACTCTGGGCGCGGTCAC

ACCCCTACCCGATTCGTCAGCGCCGCGATCACCCGCGCGATCGCATGGTCCGTGATGTTG

GGAAACGGCAGCGCCGCCCGGCCGACCTGCCGGATCTGGCCGGCGTGCTCCCAGTCCGGC

GGCAGATCCGGAACGATGTCGTTCCCGTTCTTGTACAGATTCAGCGGCACCTTTCCAAGC

ACCGCCGCCACGCTCCCGTTTGTGCTCACCCTTGGCGGCTCGAATCCGTAGACGGCCACC

GGCGGATTGCCGCCGACCACCATCGCCGCCGCGGCCATGATCGCGATCGCAGCGCCGAGC

GAATGGCCGGCAAGCGTCACCGGCCGGCCGTCGATCGCGGCGAGCACGTCGACGGCAATT

GCGCCCCATGCCTTCCAGAAACCGTGATGCACCTGGCCGATGCCGATCACATCGATCGGA

TGGGCGTCCAGATCGGCCGCCACGCAATCAAGGTTGTCAGTGCCCGGAAACGCGACGATG

AGGCCGCCGGCCGTCTGCCGCACGATGGCGCGCGAGGCGCTGTCTGCTTTGCCGATATCC

GGCTTCGCGGAGTACGCCTCCTGCGCCAGCAGCGCGTAGTCGCGCGGGGTCATTGCAGCG

GCGCGCCCGCGAGCGGCGTCGAGGCGGCGGCCGGCACGGTCGCTGCCGGCGTGCCGTAGA

CGGCCAGCCAGTTCGACAGCGCGATCGACGCGGCGCCGAGCGCGAGCCGGATCGTCGCCT

GCACGCCCGGGTCGACCGGCAGCAGGCCTACGAGGCCAATCGCCTGCGGGATCACCGTGT

TGACCAGGCTCTGAACGTTGGTCGCATCGAGCGCGGCCGCGGCGGCGCACAGTTTGCCGT

TGTCCTCGGCGAGCAGCTTCAGATTCGCGTCCGCCGGCAGCGACGCGCTCAGGTCGAGCA

GCGTCGGCTGGACGACTGCGCAGGTCTGCGCGACCTGCAACTTTGCGGTCGCGGCGAGCT

GTTCGAGCTTCTGCTGCTGGGCCGCCGTGCAGCCGGCGGCAGCGATGAGAACGGACGCGG

CAATGCCTGCCGCAAGCGGCATGAGCTTTTTCATGGGATTCCTTCGGGAATGGTGCCGCG

GCGCGCGGCGGGAGGGTTACTGCTGGGCGGCGGCCTTGGCGGCATTGCGCGCGATGAGCG

CGTTGTAGGCGGCGTGCAGCCCGGCGACGATCAGCGTCGCGACGAGCGACGACGCGCTGG

TCGGCACTGCACCGTGGAACCCGCCAAGGGCCCAATCGACGGTCGGAATGAGGTCGGTGA

CGCCGAGCGTGATGCCGCCGCTGACGAGGCTGGATTTCATGGGCATGGCTACTCCTTCTG

GTCTTGGACGAGTTCGTCCGGGGTGAAGACGAACCCAGCCTTGCGCGGGAACGCCTGGAA

CACGAAGGTCGGGAACGACCGGTGATGGATGCCGTGTGTCGGCGACCGGTGGAACTTCGC

CGAGAGCGGCAGCATGTTCACCATCGCGTCGACGAAGGTCTCCGGCTTGGCCGGATCGAA

TGCCTGCCAGTCGAAGCCGCGCAGCTCGACCAGCTTGCAGACGAGCCAGATGAATGATTC

TTCGACCGGGTACAGCTCTTTCGTCGGCCGGTCGGTGGCCGGGTCGAGCACGGGGATTTC

CTTGATCTCGCCCAGCGCGATGCCGCGGACTGCCACCCAGTCGACCGCATCGGAATCGGC

CCACTCGCAGAACAGATGGTGATACTCGGGCGCCGGCTGGCCGCTGATTGAGCAGCGCAG

GCCGGCCGCATGCCCTTCCTTTTTCGTATGTCGGAACGTCGCCGACTCCGTGCGCGGTTC

GGCGTGATCCGGGTAGTACTCGATCTCGACATCGGTCACGCGCACAGCGTGCTCGCCGGC

GATCTTCGGAATGGTTGCAAGCCCCTCGGCCGTGCACTTCTCGCACGGATGCTCGAGCGG

CATGTCGTGGCTGCATCGGGTCATGTATGGATCCAGAAATAGAAAAGCCGCCTTGAGGCG

GCTTGGGGGAGATTGGTTACCGATCTTTATGAGCGAACAAACATGGAGGAAGTGATAATC

CCCGATGTTCTTGCTAGTTGATAACCGTTGAAGTTGGGATGGGTGCCATCCGTCGTGAAT

GCGCTGGCCGTGCCGTTCACAATCCACAGACCGCTGTCGCGCGACGACATATACAGGTCA

GCGAAATCGAAATAGCCGGCGAATCCCATCGACTGCCAGTTCGCGCGCATGCGCTGGTTG

AACGCGATGATATTCGGGTTGCGTGCGTCTTGTACTTGGTTGGCGAGCGTCGCGAAATTG

TCGGTCGATGTGCAGCGCGGCGGCAGCGTCGTCCCCCATACCGGCCGGCCATTGAACCGC

GCATTGATCGCTTGCAAGTTGTTGAACGCAGACGTGACGGTCGTCGGGTCGGTGGTGATG

TCATTGACGCCCATTTCGTTGATCACATGCGTCGCGTACAACGCCAAATCGCAACGCCTC

ACGCCATTATCCGTCGCCGTGTTCGCCGCACTATCACCAGACGAGCCGCATGTGATGTAT

CCGATATTCGGATACAGGCACGGCGCGATCATGCCGCTGTCGCTCGTTCCTATCGACGGA

ATCGGGAACGTGGTGGTATCGCCATGTACACGGCTGTCACCGAGAATGAAAACCGACGGT

CGACGTGTCTGGCCGAGAATCGCAACAGGCGCATAAATGTTGCCCGTACCAATGCCGTTT

GTCGTGATCGTGCCGCCCATCGTCAGATCGACGCCGCCCGTTGCGGTGATGATCGACGCC

TCACCAAGGTTCTGTTGCTGCTGATAACTCGAATAGCACACGCCCCACGTGTTCGTTTGG

TATGTGCGAACCCAGAACTTCGCACCGCGCGGGATGCGGCAATCCAGCACGTCCGATGTC

AGCGTTTGCCGAATGCCGATCGTGCCGGCAGCCTGACCGTTGAATGTTACTTGCCGAATC

GTGCCGGCCGGGTATTCGATCGCAGCGGTAACGGTCGAGGCGGCACCGGGCAACGTCTGA

TCGCCTGCGAACCAGTTCGCATATGCCAGCTGAATGCTGGTCATGTCGTCCTGCGCGAAA

TGCACGGTCCGACTCATCATTTGGAAATATGATGTGCTGCTGCTGGTAGGCGCTACGCAA

TGCGTTGCGACAATTCCCTTGTACGGTTGCGCGGCGAGAAATGCGGAGATGGAAAACGGA

GGAATCGACGATGCCATATCAGTCCACCATCACGGAAACAATTGCTGACGACGACGGCGC

ATAGATTTGCAGTCGCCCCTTGAATGTTTGCGATGACCACGCGCCACCCTGCGCGCCGGC

GGCTGAGCCACCGCCAAGCGCGAAAACGCTCGCATTGTTCGGCGCAGCGCCGGAACCTGC

GGTGCCGTCATCACGCACCACGACAATTTGCGCACCGCTGATGTTTTCGATGTCGACGTT

ATTTCGTGTCGCGAGTGCGGGAACCGTGGCGATGAGGACGTAGTTCGCATACGGGCCGGA

CGCGCCAAATGCTGCGCCGACGTACGGTAGCGTCGGCTTGTTGGCCGAATAGTCTTGGCC

AGTCGAGCCGCCTTGTGTTACAGCGACATTGCTGTTGTCTATCCAGACTTTCAACGGTCC

CTGCGGCATGGTCTTCCTTCGTTTTGGTAAGAAAATCGTTCAGATGATGCCGAGCGCCGC

GCGCGCTGCCTTGAACAGCGCGTCGCGGTTCTCCTTCCCTTCCATCGCCTTGTTGATCCG

ACGCGTGATCGAGTCGAACGACTGCGCGTCGGCGAGCGTGTTGCAGCCGTTCGCGAACCA

CCACCACGCGGCCGAGAGCGCGGCGACATTCGGATCGGTGCGCACCAGGTCCGGGTTTCC

GGCCGCGTCGACACCGCACGCGGCGCCGAACGCTTCGAAGTTGTCGTGGAACGTGAGCTG

CAGCATCCCGGAGCCACGGAACCGCCACCCATCGCCGCTCGCGGCGTCGCCATTGCCCAT

CTGCCCGGCATAGACGATGTTCGCGATCTTCTGCTGTGCGGCGAGCTGGAGCGCCGGCGC

GCCCGGCTGCCGCCCGAGCGTCGCGGCAAGCGCCGGCGTCATCCGGCGGAACGTCGCGCG

CAGCCCGGCGACGCTGTAGTTGAACGATTCGGCGAACTGCGACAGGCCGGCCGACTCGTG

GCCGATCTGCGCGAGGAACGCGGCGACGCGCAGCTTTGACATGCCGATCGAGAAGCGGTC

GCACGCGGCCTGAATCGACGGTAGCATCGCGGCCGCGCGCGCCGGCGTCGCGCCGCATCC

GGCGGCGACAATGGCAGCGGTCAGGTTCATTTGAAAATCACCTCGAACAACTTCAGCGCA

TTCGCCGGCCCGACCATCACGGCCGCCGCGAGGAAGTAAAGGAGGTACTCGATGCGCTGC

ATCCGCTTATCGCCGCGCTGAAGGCGATCCTGGATACCTGCATAGCGCTCGGCGCAGACG

GCTTCGTGGACCGCGATGCGCTGTTCGTTCTCAGCAATATCAGCTTGCATATCGTCGTGA

CTCGTCACAGGTGATCCCCGAAATGAAAAGCCGCCTCGTGGGCGGCTGTTTTTGTGTGAT

GGAAATGTGGGCATCCATCGGAAAGCGGTATGATTCCTGCCCTCAAGATGGCGAGGGGAA

CCTGATGTCAAAAAATAATGGCGAAACGCAATCGCACGAAACCTGGTGCGACTATCTGCG

CTGCATCGCGATGACGATGGTCATTGCGCTGCATGCGTCCGGTCTTTGGTTGATCGGATC

CATGTCTTCGGTCGATTGGCGGATCGCGAACGCCGTCAACTCGGCATGCCGCCCATCCGT

GCCGATCTTCTTCATGCTCTCGGGATACTTGCTGTGCCGCGGCAAGCCGATGTCATTCTT

GACCTATGCCCGGAAGCGAATCGCCAGAATTGCACCGGCCTTTTTTCTCGCTACCGGATT

CGCACTGATCTATCGACAGTTCTACATCGGTGAGCATTTGAGCATCGCATCGGCTTGGCA

ATGGATTTATATTCCGCAGTTCTATCACCTGTGGTTCTTCTACACCATCGCCTTTGTGTA

TGTGGCGTTGTGGGTGGTGAAGCCGAACGCCATCAGACCGATAACCGGATCGATAGTCTG

TTTCGCGCTGATATTCGCCATGGACTGGCGAGGCGAATCGTTCGCCGCCTTCCTCTTTTA

TGCGCTGGCCGGATATTTCCTCGGCACTGCGCCGAGATCCCGACGCGCTCCAATGCTATT

TATTCCGGCCGCCGTCATCATGCTCGCGATCGTCTATGCGGAAACGGCCAGTGCATCGAA

TCAGGCGGGCCACCTTGATCAGACTTGGTACAGGTACACCTCCCTGCCCGTAGTGACGGC

ATCGTTCCTGCTGTTCTATTCGGCACGAAATATGCTCAGCACACTTTCCGCTTCGGCCAT

CGTCGAGCGCGTATCTTTCGCATCCCTGTTCGTGTACTGCGCACACCCATTCGTGATCGA

TGCCTTGACGCGCGAGTACCCGAAATTCACGGAAATCGGAGCAATTTTCGGAATCCCGAT

TCTGATTTGTGGAAGCACCATCCTGCTGGTCATCGCGCGGCAACTCGGGCGAACGCTATT

TTCCAGGCGCTCGCCCAGTCTCATCACTTGATGCCGCCGGCCTGCCACGAGAACGATGCA

GCCACGTTGGTCACACTCGAAATCGCGATGTACGAAAAACCCGTAGTCGATACCGCGGTG

ACCAGATAGCCGAGCGCGCCATTCGTGCTCGTCGGCGTCATCGTAATGTTGGACGCAGTT

GGGGCCACCGTATAGGCGTTGGGGAATGTGACGGTCGTGGTCGGCGACGAAAAGAGGGTG

CCATATCCACTCCAGCCGGTCGCGGCCGTCGTCGTGGTTCCAGTTTGCGTATCCAAGCCA

ACGATCGTGCTCGTGCTGGAGTTCGAAACGGTGGTCGAGAGCGTCGCATAGACGTTTTTG

CCGATCTTGCCGTTGGAGCTGCTCGATGCGATCGAGATCCCCGTCGGGCCACCGCCATTT

CCCTTGAACGTATTGCCGGAAATGTTGAAGTCGGTGATGCTCGTCAGCTGAACGCCATAT

CCGGTGCTGCTCGAAAGATTGCAGACGTTACCCGTATACGTCAACTCATTGATGAAACCA

CTCGCGTCCGTCTGCAGACATGCCGGCTCGACTCCCATCTGGTTGCCGACGATGACGATG

TTCGAAACGTTGGACGTGCCGGACGTGCGCGCAAGCGAAATCGCTTGCGAGGTCATGTTC

TCGATCGAGTTGCCGATCAGAAGAATATCGCTCGTGTTCGACGCGCCATTGAACTGCATG

CCGAAGCCGACGTTACCGCCGAGCAATTTGTTGCCGATGACCTTCAGGCCGCCCGATGAC

TTCCAGAGAAGGGCCACGCCCGCGGTGCCGGGCGTGTTGAACAGCGAACCCTGAACAACG

CTATCGCCGGTATCCGTATTGTTGGTATTCGCAACCTGGATGCCTGCAGCGTTGTAACCC

AGAAACTCCGAATTGTTGATCGACCAGTACGCCGCCGCGACGAAATCGATGCCGATCGGG

CAATAGGCGATCGTGACATTATCGAAATGCGCGTAGTCGATCTCGCCCGACGTCGGATTG

AGCTGAAGGCATGCGCCCCCCGTTTTGACGGGAAGGTTCGACGAGACAGGCGCCGTCAGC

GCGAAGTCTTTGAAAATCGGCGAATAGGCCGAGCCGTTGAAAACGATCAGATTCGCCGAC

GAGGTATCAGTCGAGTTCAGGCGAGTGCCCGTGCGCCCCAATCCGACGATACCTCCGGAA

GAAAAAGCATTGAGTGTCGTGAAATTCCACGTGCCGGCCGGATAGAGGATGACGGCGCCG

GTCGCGTGCGCTGCGTTCATCGCCGTTGTGTTATCCGTCGAGCCATCACCCTTGGCACCC

CACTCCCGCACGTCTTCCGGGCCGGATGGAAAGTTGGCGAGCCAACATTTGCTGTCCGCA

CTCTTGACCTGCGAACCGTTATCGCCGTTGCCCGAACTGAGCGAGCATGCGCTTGCGCTT

GCCGTATAGGTCAGTGGAGGTGCATCGCCCGCAGCATAGAAACCGAGCCGCGTGATCGTG

CTCGTCGTCGTCGTGGCGACCGCCTGCAGCGCTGCATTCGTCGGGACGGTCGGATAAAGC

GTCGTCGTACCGAGCGTCGGGGCCGCGCCGAACGACGTCGCACCATTCGATGACAGCGAC

GTGAAGGCACCGCTGCCCGGCGTCCCCAAGCCGATCGAACCCGGCGCCGCGAACGTCGCG

CCGCCGAGCGTCGCCGCATTGACAGCTGAGTTGCAGGCGAACCCGGTGCCGGACGTGTAC

GTCAGCGCGCTCGATGACGTCGAGCAGCTCGGCAGCGCCGTGGCCGTGGGCGATGCAATC

GAACCCGTGACGTTCGCGAGCACACTGTTCGCCGCCTGCGTGGCCAGGTCGCCCGTCGTC

ACGAGACCCGTCGCAGTGAGCGCGCCCGTGATCGTCGGCGAGGCGATCGTCGGCGACGTC

GACAGAACGGCGCTTCCCGTCCCCGTGGCGCTCGTCGCGCCGGTGCCACCATTGGCCGGC

GTCAGCGGATTCTGCAGCGTGAGCGAATTGAACGTCGGGCTCGGATACGTCTGGGCGAGC

GCCATCGCCGGCACCAGAAGGGCCGTCAGAAGAATTTTCTTGATCATGGTCGGTCAGGAG

ATGGAAATGACGCCGTCGTTATTCCAGACAACGCCCTTTGCGCTGGGGGGATTGGTCGGC

AGATCGTTGGCCCAGGCGGTGCTGGCAAGAATGGTATTGAGTTGAGAGAGCGGCATCGTG

CAAAGCGCGACTTGCCCGTTCTGCTCTTGTTGAATCGTCACGGTTTCATTGCCCGTGAGC

GCCTGAGGCAGGCCATATATTTTCAAGTTAATACCCTCGCGCCATGTAATACCCGTTGTG

AGTTGTTGAATCGCCATTCGACACGATCAGCTGGGTTGCCGAAGAAATGTCCCATCCGAG

AAAGACCGCTGTATTTGTCGCGCTTCGCTGCTGGCAACCGATGATGTTGATGCACGCAAC

AGGGAATTGTTTGGGGAAGTTAAAAATGTTGCTGTTCCCAGGCGGCACACTGACATACCC

CCATTGCTCGACGAAAAACCCAGACGGGCTATTGGGATCCGGATATTCCTTCCATCCGCC

CTGCCCGAGTTGACTCTCGAATTGCCCCTGATTGACCGCTGCAGTCGCGCTGCCGGCGGG

AGCGCCGGCGACAACGACCGGATTGTTAAATGTGTTGTTTCCAGTCCATGTATTGTTGTC

GCCAAGTTGGCCAAATGCCTGCATCTGACCCATCGTCGGCGAGCAGTAGGCGTAATCGCC

GGTGGACCACGCCTGCGCACTCGTGTTCTCCTGCCCGCGCAGCAGGCCACTGAGCGTCGC

GCCGGAGATCGCGGTCGCATAGATCACTTCGAACTGCTGGCGGGTCGCTGCGTCGTTGAG

CGTGATGACGAGGACTTTCCCGACTGGAATCGACGACGGCAAGTTGGCCGCGCTTGACAG

AGTGAGAGATGTTGCTCCGGACGAGATCGACCCCGCCAACGTGGTACTGATGTTGTTGGC

GAACGTGAAGAGAGAAGGCATGTTCGAATTCCTGACTATGCGATCGCGACGACACCGCCG

TCATTCCAGAGTTGACCTGTGCCAGGCCCCGGATTGGTGAGCGGAAGATTCCCGCCGCCG

AGCGCGAGCAGTTGCGGTGGGAACGTATATGCGAAATACAGCGGAGGTGCTGTTGGATCC

GGCGTGACGCCGGGAACGACGCTGATCACGCCGCCGTTCCACCACACCGCGCCGGGCGCG

AGGCCCGCAGGACTTATTGGATAGGTGAGAGGAAATGCCAGCGTCAGGACGCCACCATTG

TTCACGAACTTGTCGGTGACGAACTGCAGCGTGTACATGAACGGAAAGGCCAGCAGCCCG

TTCGCATAGCACGACTGCAACGCCTCGTAGCCAATCGTGTCGTATGCCGTCACTGTGAAG

ATGGTGCCCGACACGGTGATCGACGGCGGATCATTCAGCACCGGCCAGTCGCTACCATTC

GCACCGTTGATGAACCGCGCGATGCGATTCTTCAGCCACTGCATGTTGAACTGCATGCCA

TCGCCGCGATACAGATGCCATGTCAGGACGCGCTTGTAGATGTCGTCGTTCGCGATCGAT

GCGGTTTGGCTCGCCGAGTAGTACTGCGCGTTGTACGCGATCGTGTTGTACGGATTCGCG

TTGTATCCCGCGAGACGCGTCGATATCTGCGATGCAAGCACCGGACGACGGATTCCATAT

ACTCCGCGGCCGATCCAGTCGAGCAGCGGCCCCGTAATGAAGGGCGACGTGTAGAGCCCG

AGCGGCGCCTGATTGAACCAGTCGAGGTATCCCTGCGAAATCGAGTTGAAGCTGTCGACG

AAGGCCTGAAGCGACGGGTCGTCCTCATACTCCTTGTACAGGTAGGACGGGATGATCTGC

TGCAGCGGCTTTGTACCGAACGATTCGATCTGCATCCATCACCCCTGCAATACGGTCACG

CCCGTGGCCGAGCTGAAAAAATAGCTTTCGGGATCTGATGTGATGATGTCGGTGCCCGCC

GCTGGCGTGGCTACCACGCCGTTGATCGTTACCGCGAATGTCAGCGTTGTCACATTCGGT

CCATCGATTACCGATGAGACCGCGTCAAGGAAAACAGACGTCATCTCGTTCAGGTTGATC

GGCTGACCGGCGAAGATCGAGTTCAGATACGACTGCAGCGACGGCGCCGCCAGCTGATTC

ACGGAGCTGCCTGCGGTGAAGTTCGGCAGCGTTGTATTCCACGTCACCGCAAGCGTCACG

ACTTGCTGCGGTGGATTCACGAACGGGATGTTGTACGTGTTCGGATTCTGGAACAGGGAG

ACCTTGACGTTGCGCGGATTCGGCGAGAACGTCGCGCCGCCGGTGTAGGTGCCGAATCCC

GTCCCGTTCGCGGTCGTCGTGATCGAGTTCCCCGATACCGACGCGACGGTGTACGTGCGG

TTGAACGCGCTCGGCGTCGCGCCCGCGACCGTGAACGTCTGCCCCGTTGCGTAGCCGCTC

GCAAGGTTGGTCTGAACGACCACCGGATTGGCAGCCGTCATGCCGGTGATACCGAGTTGC

GATCCTTGAAGCAGTGCGATGTCGCCGGCGCCCTGCAGGATCGCCGCAGCGACCGCATAG

GCATCTCCGCCACCGCATACGACCTGCCAGCCGCCCGAGACCTGGTTGATCGAGATCAGA

CGCTGTTGCACGCCGGTGATCTTGCCGAGCAGTGTCTTCAGGAAGGCCGGCGTGCCGACC

GATGCGACCTGCCCCGCCTGCAGCACGCGGCCGCGATAGGTCTGCGGGCTCTCGGCACTG

GATGCCGCGACGCCTGCCTGCGGGTTCGTCACCGTGATCAGCCCGACATACTCGCTCGGT

AGCGACGTGACGATCTGGTCGACGGTGTTGGCAGGGATCGCGAAGGTATTGCTGTTGGTC

GCGACAGCATAGAGCTGCGCCGACTGTCCAGCCGACTGAATCACGCCACCGTCCTGCAGC

GCGTATTGATTCGCCCCGTCACCAACCACGAATCCGGCCGGCAGCACATAACCCGCCGGC

CCGCTGAACACGACATAGACGTTCCCGTTCGCGCTCGTGCCCTGAGGCACGCCGAACTGA

CCGCCGAGCTGCGCGAGCACGAATGCATTCGCGCCATAGGGCGTGACGCTGTTCACGGAT

TCGACGCGCGCCTGGTCGATCGTCGACAAAGCGCCGACATCGGTCGACGCAACGTCTTCG

ATCAGACTGCCAGGCAGATTCGCCTGGTAGTCCGGCACCTCCGCGGCGACACCATTGACG

AGGTTCTGCCGCAGCGTGGTCGGATCGGTCGTTACCGGGCCGGCTGCGGTCATCACGAGA

GGAATGTTGCTCATATCGCTACGGTCGCGTTCAGTAGTGCGCCGCTATGCGCGACGGCCT

GGATGTTGTAGACGGGCGGGAAGCTGCCGGGAGCGCGCACGATCGCGAGCGACGCGAAGT

ACGGCGCGAACTGTTGCTGCGTGACCATCGCGTAATAGTCCGGGAACACCTGCGTGACGA

CGGTCTGCTGCGCGGGTATCCCGTAATTCGCATAGAACGGCGACTCGCCGAGGTTCAGCT

TCAGCACCTGGCAGAGCGTCGTCAGATAGACGTTGTCGTTGTAGCCGTTGGCGTCAGTCG

TGACGGCGATCCATCGATAAGTGCCATCGGCGTTGTAGATCCTGCCCCACGTGCGCACGT

CGTCGCTCCCTCAATTGATGGGCGGATCGCTTTGGACCTTCGATCCGGTGCCCGGGAAAT

ACCCGTGCGTGTGATTTGCGTAGCTGTTGCCGTCGATCGACAGGCCTGACGCGTCGAGCG

TGATCGTGTGGCCGCCGAAGCTCATGACGATGCCGGTTGCCGTCAGCGAGAGCGACGCGT

CACCGTATGTCATCGACACACCGTTCTGGTTCACGACGCATGACGACGGCGTCGCGCCCT

GCGTGGTGCGCGCGATCATGCCGTTCGGGCCGCACACCTGCGCCGCGTTCGGGTCATCGG

GCGGCGATGCCGCATTGCTGGTCGGCACGAATACGAGAGCGGTCAGGTTGCCGCGGCGCC

GGAAATCAGCCGTGCCGCCGCCGAGCCCGGAGATGCCGCCGAGATATGCGTCGGCCGGCA

TGGTCACGCCCTTGTCGCCCTCCTGCGTTGGATTGCGAATCCACGGGCTTTCCGCCTTGG

GGATCGTCACGGGCGGCAGTGTCCACGTGCCCTGCATCTCGAACTCGACCGTCACGATCG

CGCCCGATACCTTCGTCACGCGACACGGCAGCGCGCTGCCGGTGTCCTCGATCGCCTGCG

CCGCGCGCGCGATCGCCACACGGTTCAGCGAGCGCTGCAGCGGCAGCTTTGCGTAGTTGT

CAGCCATTGCTCATCACCGCGCAGTTTGCGATCGTCGCCCATGACGCGCCATCGAGCGCG

CGGAAGTTGCCGATGTGCCGCAGCTCGATCACCGAGAACTTGCCCTGGAACGCGCTCTTG

TACTTCAGGCTCGACGGCAGCGACGACGAGGACGTCAGGACGATGCCGGGCGTGTTCTGC

AGCCCCTGCGGCATCAGCAGCTCCGATCCAAGCTGTATGTCGGCTCGCATCACCAGCTTG

ATCTGCATCACGTTCGGCGCGACCCACGTCGGCTGACCGACGAAGTCCGTGAATGCGAGC

TGCACGGTGTTCGGCTTGTACGTGCTGTCGTAGACGACGATCTGGCCGGCCTGGATCGTG

ATCTGCACGCCCGCATAATCGGCGCCAAGGAAGTTCCCCTGCGTGACCTCGACCAGCAGC

TGCGCAAGCTGCTCGAGCGTCGAGCACCGATGCACCTCGTCGTGCGTCTGCACCAGCTTG

TCGCTGATGTTGATCAGCGCCGGCATCGTCGGGTAGGCGACCGACAGCGTCTGCTGCAGC

GCCTGCGACAGCGGCATTCCGGCCATCCAGTTCAGAACGATATTGCCGGGCTCGTCGAGC

GTGTACAGCGCCGGGTTCAGCACGAGATCGAGCGTCATCTCGGTGCCTTCCCAATTCCCA

AAGGACTGCCACACCTGGCCGGCCGCGATCAGCCCCGCCTGCTTCGGATTCGCCAGCGGC

AGGCCGGCCTGCATGCCGCCCTTCATCGTCAGGTTCATGCCGGCGAACTGTTGCGCCTGC

AACAAATCCTCGAGCGGCACGCCTTCGATCAGCAGCGACTGGCCGCCGAGCGGCGTTCCG

TACGTGGCGACCGGGATGTCGAATTCGATATTCAGCGCGCCCGGATCGAACTTGCCATTC

GGATGCGACGTCCATCGCCGGAACGGCTTCGTGCCGCCTTCCGGCGTGATGGTGATGTCG

TAGTAGCGCATCGATCAGGGATTGATTTCGAAGTTTCCGGTGTCTTCGCGATACAGCAGC

GTCGACGCCGTGAAAACGCCCGGCGCGAGCGGGATGTCGAAGCCGAGCGGCGAGCCGACC

ATCGCGCCATTCCAGGCGATGTTGCTGTTCTGGTCGGTCAGCGTGACGTACCAGCGCATG

CCGGCGATGTTCCACGTCACCGACAGCGAATAGGCCACGCCGTCGAGCGTGACGGTCGCC

TGAAACGGCGGCGTCGTCGCGTTCGACGGCTGGAAAGGAACGAGCGTCGTCATAGCGCGG

GCTGGGAAAGGAACTGATTCACGACGCCGGCCATGTTGCCGATGCCCTCAAGTGCGCCCT

GCACCGCCGAGCCGGCCGCAGCCACGGCACCGGACCATGCCGGCGACGTCACCTGCTGGC

CGCCCGCGAGCTTGCTCATCAGCGCGCCGAAGGCGCTGCTCGCCGCCTGCTGCGTCAGCA

GCGGCTGCACGAAGTCGAGCTGCCACTGAATCTGCTGCTGCTTGCCTTCGCCGCTCGTGA

CATCGGTCATCGACGTCAGGATGCAGTTCGTATAGATCCGCGCGGGCGTCGCCACGTGGA

ACGTGCCGCCCGCAGCGCAATGCGCCTCGAGCGAGCTTTGCAGCGACGTGAAGATCGCCA

GCTTCGTCAGGTAGCCGCCGGTGTCCTTCACCGGCGCGATCATCAGCAGCGAGACGTTCT

TCGGCTGCATCACGATCGCGTTGCCGGCGACCTGCTGGTTCGCGAATGGGTATGTGCCGA

CTGCATTGTTGATGATCGTGCCGCCGGGCAGCACGACGAAGCGCGCGAAGAAGTTGTCAA

GGCCCACGCTGCCGCTCGACAGGACGCTTTGCGCGAGCGCGCCCAGCTGCCCGACGAGTC

CAATGATCGGCATCATGCCGCCGAGCGTGTTCGCGACGATCCCGCCATTCAGGATGATCG

GAGAGACTTGAAACGATAGGTCGTACGCCGAGCGAAAGCCCGAGGAAAGGTCGAGTCCAG

CCATCTCAATTTCCCGATGCTGCTGCGTTGGCCTGCACCGCGACGCGCGCGGACGTATTG

TTGCTCACCTGGACAGACACCTTCACCGCATTGCGCTTGGCGACCTCGCCGGCGATCTGC

GCGATGTAATTGCGAGTCTCGGCTGGAAGGTGGGAATCCCACTGTCCGCCGTTCTTCGCG

ATGTCTTTGTCGAGGTTGCCCGGGCCCCAGTTGTACGCAGCGAGTGCCTTGCGGATGTCG

CCGCCGTACTTCTTCATCAGGGACTGCATGTAGCGTCCCGATGCGCCAGCCGAATCCTTG

AAGCTGAAGCGGTCACCGCCGTTGCCCCAATCGTTCCAGGCGGCCGACGTGAACTGGAAG

TCGCCGATCGCCTGATCGCCGTTCTTCAGCGCCGGGCCGATGAGGCTATTGCCCGATCCC

GATTCGACCTTCCACATGCGCGCGAGCGTGCCGGCAGGCAGACCGCGCTGCTTCTCAATG

TCCGCGAGGTAGCCAGACGGATCACCAGGCATCGTCAGGCGGTGCCGGAGCTTGCCGAAG

AACTGCTCGGTCGCCGTCGGAGCGGACGGCGTGAAAGGACTGCCCGGCGCGCCGCCGGCG

CTCGGCGGGTTGTCGCCTGGCGAGAAGAATTTCCCGACCTTGCGGATCGCGCCAACGATG

TCGGCGATGCCGTCCGCGAAATCTTTCAGGTCCTGCTTGAATCCCGGCGACCCGAGATAG

GTCGTCAGCCCCGTGATTCCGTCCTCGACCGCCTTCAGGTTCTTCGGCGTGAAGATGTCG

TTGATCAGCTGATCGGCGTCCTTCGTCAGCGTCGTCACGAAGCTGCGCAGCGACGGCGCC

AGCTCGACGAGCCGGTTCGTCAGTGCAGTCTCGATCGTGCGGCCGGCGAGTGTGATCTGG

CGATCGAACTCATACCATGCCTGCGTCGTGCCATTGCTGACGTTCAGCGAACGTTGATCG

CGGCCGTACTGCGAGCGCGCCGCCACCAACTCCGACAGCGGCGTATTGCCGAGCCGGCGC

ATGTCCTCAAGCGTCAGGCCCGACTGCGTGAAGCCGGTTGCCGAAAGATTCTCTGACGTC

CGCAATGCCGCCGGTGTTTTCGCCCACCAATCATGCGCACGCATGGCGAGGCGCATCGAC

AGCTGATCAGTACCCTGATTTGCCACGGCCTGATCACTGAGGCCGGTCGCCAGGCCAAGC

CATACCCGGCCCTGATAGCTGTTCTGCGCGTCGGCGACGTGCGACAGGATGCTCGGGTCG

AGAAAGCGCCCGAAATCCATCCCGAACGCTTTGTACTGCCCCGGCGTCAGGCCGACGCCG

CGCGCGCCGCGCTGCTCGGTCACAGCCGAATGCGCGAGGTCACGCAGGCTGATCGCGCCG

AGGATGCCGCCAAGCCCGGCGATGCCGCCGCCGATCGCGCCGATCTTCAGCAACCACTTG

CCGATGTCGAACACCGCCTTGCCGACGTTGCTGGCCTCTTTCGCCATCTTCGACATCGTG

TGCAGGCCTTCGCGCGCCATGATGTTGAACTGGCGCTGAGCCTCGGTCGACGACTGGATG

CCGCTGGCGAGCGACTTCGCGGTGGCCGCGTTCCGGCGCATCGACGTGTCGATCTGCTGC

CATTCCTTCGGCATGCTCGCGACCTTGGACTCGAACTGCTCGTACAGCTCGTAGAACGCC

TTAAATTGCTCGGCGTTCACGTCGATGTTGATGATCGGCTTGTTAGCCACTTGCGCCTCT

CAGGGTTCGGATCAGCTCGAGGATGTTGCGATCGCGGAAGTCGCGTGCGCTGCGGTATTC

GAAGCCATGTCGCTGCACGGTCTCCGCAAAGCCCTCCCCGGCCACGAACTTCAGGATGGA

ACCGAGGACACCGCCTGTTGCGCCGAAGGCGCGGCCTTCGTCGAGCTCGGCAAGGAATCG

GCGAATTCCATAGGCGACAAGGAGGTAATCGACCCCTTCAGCAGGGAAGCCGTGCTGCTC

GCCTGTTTCTTCCGTTCCGCCTTGCTCGCGAGCGCACAGATGCAGGTAAAAAAAACGATT

GCCGATTCCGTCTCGGCCTGGTCCTCGGAATCGATCTTGCCGGCGGCGACCGCGCTCTCG

ATCGGCAGAAGATCCCAGCCGCCGGACGTCGGCACGAGAACCATCGTCAGGCGGCGGATT

TCGGCCATCAGCGCCGGCGTCGCCTCGTCGATGACAGTCCTTCCGTCCTTCGCGTAGCTG

CCGCGCGCCTCGGCCTCACGCATGCCTTCGTCGAGCAGCGTGAGCGCAGCGATGCGCGGG

CCCGAGTCCATCATGTAAATGCCGCCGCGGCTCATGAGCGACGCCTTCGTCGCCGCGAGC

ACGCGATAGTTAGCCTCGAACACTTGCCGCGAGATCGGCGTGTGGTAGGCCCACACCTTC

ACGCCGGCGTCATCGCTGACCACCGGCACGACGAGGTTCATCGCCTCGTTGATCTGGATC

ACGTCATGCTCCACAGGTTATTGTTGACGTAGTACGTGCCGCGCAGCACCAGCATGCAGA

CCGCGTCCATGCCGTCGAATGCGTTCGGGTCGAAGTGGCGGATCGCGGTGTCATACAGCG

TGAACGAGTCGAACGCGGCCGAATCGCTATTGATCTTGATCTGACCGAGCACACTGTTCG

CTTCCCACTGCGCACGCCACGCCATCGACAGCGCCTGCGTGCGCAGGATGCCGACGGAGA

TCGTCGCCGGCACATACGGCGTCGGCGAGTTGACCAAGCCCGTGCCGGTGCCGGTCTGGT

CGGTGAAGTCGCCCTCGAACGCGATGCGCGCGAACGACTTCCCCATGTACGGCGCCGTGA

TGTTCAGCGCCGTGAAGGCCGGCACCAGCACCGAGCACCGGACGCGATTCAGGGTGCCTT

GGCTGACAAGCGGATTGGTTGCCATCTATGGTTCCCCTTAGAGCTGAACGGCGTCGATGT

TGAAGGTGATGGTCTGGAATCCGTTCTGACCGACCACCGTCGCCGCGAGGCCGTTGTAAA

TGCCAGCCGAGTAATCGCCCGGATTCTGCGTCGTGTACGTCTGGAAATCGATCGCCGTGA

CGGCCACCGATTGAGCGCAGCCAAACGACACCGCGCTCGAGCCCGTGTTTTCGGCGACCG

ACAGCAGCGTGTTGATGCCGGGCTGATCGTAGAGCAGCGGCGGGTTCGTGTTCGAGCCGT

TGATGATCGCGGCCGCGAGCGCTTGCTTCGCCTGGATCTGGAACCAGTCGATGCCATACC

ACCAGCTCGCCTGCTGCCCGTCCATCGTGGTGCCGTTGCGCAGCGTGGCATCCGAGATGC

CGCCTTCTGCGCCGGTCAGGATCAGGTTGCCGTAGTTGCTCAGGATCGACGTGATCTGCG

CGTTGTAGCCCTGCGCCGGCCACGGCGTGACGCCATACAGGAATCGCTGCCCCATCGGAG

CGAGTTTGTTCGCGGCACCCGGCTGATTCTTCAGCCATTGGTAGAACTGCGCAGCCGCTC

CGAATTCCGTCGACGGCGCGAGCGGGCTCGGCACGAACGTGATGACCGACTTCAGGCCGG

CGTAGTTCGGCAGATTCGCGGCCGTCGTCGTGACGTGGAAATATGTCTTGCCCGTCGGCG

ACGAGTACAGGCCGGCGAGGATGTTCAGCGCCGACGCGAGGTTCGACGTCGCAACTGCGC

CCGTGCCGCCGCCGCCCGAGAACGAGACGGTCGGCGCCGCCGTGTAGCCTGAACCCGGAT

TCGTGATCGTGACCGCGACGACCTTGCCGTTCTGGATGATGGCCGTGCCGGTCGCCGTCG

TGCCCGATGTCGGCGCGGAGAACGTGACCGTCGGCGCGGACGTATAGCCCGAACCGCCGT

TCGTCACGACGACGCTGCCGACTTCATCCTTCGAGTAGTCCCATGCCGCCGGCACGAGAT

AACCATAGAACACATTCGGGTTGTTCGAGATCCATGTCTGCAGCAGGCCGATGCCTTGGT

CGGCGCCAGTCTCGGCGCCGAGCTCGAGCACGTAGAAGCCGATGGCCGAACCCTGCGCAA

AGTGCGAGTTCGCCATATTCGTCAGCTCGGTCGAGTTGCCCGAACCGCTGAGAATGGCCG

TCAGGTCGCTGGTGAGCCCGCAGTACTGGTACGTGCCGGGGGTAAGCGTCGTGCCGCCCA

CCGAGACGATCGCACCGCTGCGCTGAAGCTGCGACGGCACGGGCGCCCGGGTGACGGTGA

CGTTCAGATTGACGATCGTCTGGGTGATGGTCTGCGCCATTTTGGCGGCCTCCTGGGATT

ACGCGTATGCGACGGAAACGGCGCCGCCGGTGCCCGGGTTCACGACGATCCCGGTGGCGC

ACGGCCATTGCAGGTAGATCACCGAGCCGACGGCCGGGTAGCCGCTCGCGTATTGCACGA

TCGCGTTCGCCGTGGCGGCCGCGCCGGTCGTGGCCGCGTCATACGCGCCGAACGTACCGG

CCGTGGCAACTGCCAGCACTGTGATTCGCACGAGCGTGCCCGACGTGGCCTTGATGACGG

TCGGGGTACTGACGTCAAGCGCCGACAGCGCGCCACCCGGGCGCGGGACGATGGGGTTCT

GGGGCATTTCGGTTACTCCTGGATGGTGGTGGTGATGCTGGCCGACAGGATCAGCCGCCG

CGCGATCGCGTCAGCGGTCCCCTGGTAGTACGACGCGAGGATCGTCAGGGTCTTCTTCAT

CGCGAGCGCCGCGATCTCAACCTGCATGCGCTTCTCGTCGCGGATCGCCGGCGAATTGCA

GAAGCCGAAATCGTCGGTGTTCAGCGAGTAATCGATCAGCGCCGCGTAGAACTGGATCGC

GCGCTGATTCGTGAATCCGTAGAACGTGAGCCGCACGGTGTCGCGCATGAGCTGCGAACT

CGCCATCTGCTGCAGCGCCGTCGGCGGCGTTGGCGCTCCAGGCCATGCGTAGGTCGGAAA

CGCCTGCAGCGCGATCGTCTCGCCCGGCTCGATGTGCGCCGTGACATACGGCGGCTCGAC

GTTGTCCGGCACGAGGAACGACGGATACACCGGCGCGCCGGCGAGGCTCGCCAACGACAG

CCAGATCGGCAGGCTGTTCGAGACAATCGGCTCAACCGGCAGGTCCGCCGCGCTCGCAAC

GAGCTGCGATGCCAGCGCCGGGTAGACGGCGAAGCCGCGGTAATGCCAGAGGCCAGCCTG

CTGATAGTTCAGCCCCGTCTCGGCGAATGCGACCTGCAGCATTGCGCCGTCGACCTGCCA

CGTGCCGATCCACATCGTGCCCGGCGCGATCGTGTTGAACTGCGAAATCTCCTGCTCGGC

CGTGAACAGCAGCTTGTTCGCGGCGATCGTCTGATCCTCTTCCTGCCGACGGTCGGTCAG

GATGTGCAGCGAGCCGCTGAACTGCTGCGCGGTGCTGCTCGCCACCCAGAACACGTAGCC

GTCCGTGGGAAGCGTCGACTTCGTGTATTGCTGGAAAGTGACGGACTGATTGCGCGAGAG

CTGCTCGACGCCGGCCTCAAGCGCCGCGGCGAGATCGCCCGGCGCGGCCGCTGCTTCATC

GATGAGTCCCATCAGTCAGTGATCCATGCACGAAACGACGCTTGATAGAGGCCGGTGTCG

ACGAATTCCGGCCGCGCCGGATTGTCCGCGGCATACGGCCGCTTCTTCCGATGGTTAACG

CCGTCGTCGGCCGCTGCGACCGCCTGTGCGCTCGCCTGCTTCCATTCGCGCGCGTCGAGG

AAGTCCCGAAACAGCTCACCAATCTTCCCCGTCGACACGTCGACCGACAGGCGCCCGACC

GGCTTGCCCTGCGCGATGCTTTCGATCTCACCTGCAATCTCGTTGGCCAGCAGCTCGCCG

ATCTCTTCCTCGTACATCTCGAGGAACACGCGCATCACGTGATACTCGTCCTCGATGAAC

GTCGCGACGTCGCCCGTGGTGACGCCGGGCTTTGCGTCCGACCCGGTATAGGCGACGTCG

ATCACGCCGAGATGCAGCGTTGGCATCAGGAAACCCCGACGATGTCCGGTCCGAACTGTT

GCGCGTAAGCGAGATACTCGCGGCCCCACGGCGTCTTCAGCAGGTCGAGATCCTGCATCG

TGAGGTTCTTCATGAAGTCGGGCACGACGAGCGAATTCGACGTGCCCTGATCCGCCGACG

ATTGCACGACACCCGCGACGAACGCCATCAGCTTGAAAGCCGTGCGCTGCTGCGAGAAGA

ACGTTGAGGGCGCCGTGTCCTGCGCGACCTTCAGCAGCCGATGCATGCCGAGGTTGTACA

CGGCGAGCACATAGACGATTGCGGGAAGGTCACAGGGCGGCGACAACGCGAGGTTGACCG

CCATCGTGTACGCCCACTGCAGGTATTGCGAATCCGACGGAAGGTCGGCCTGCGGCACGC

CCTGGTTGTAGACGAACGTCGTGAAGTCCGCGAGATTCGGCTGGGTCGGGTCGACGAAAG

CCATGCTCAGACCGGCAGCTTGGCGTCGGCACGGCCTTCCGGCGTCACCGAAAGCGAGAA

ATTCACTTCGTCACCGGTCGGCTTCTGGCCGGGCGGAACGTCCTGCTTCACTTCGACGCC

GGTCACGCTGGCCATGCGCCGGCCCTTGCCGCCGCCTTTCTTGTCGCGCGTCGCGCTGTC

GAAGGCGAGCGCGCCGCGCGTCGCTTCCTGCGCGGAGCGAAGCTCCTGCGTGTCGACGAG

CTGGTCGTGGCCCGTGACGATGTGCGTTTCCGTGACGGGCTTGCCGACACGGTACAGATA

GCCCGAGAACTCGTTGATTTTGCCGTTCACCTGCGAAGCGTCTCGGAACCCAAACTGCTC

GAGGTGGCGTACCAGAGCTTCGATGACGGCGCTCGACGCGCCGCGCGCGATCTCGCGCTG

CTGGCCCGACGGGATGTGAACGACCTGCGCCTTGCCGGCATGCTCCGGCGAGCGGAAATG

ATGATCCAGATGCTGCTTCGTGCAGTTGGCGATGAAAATCGACATGTCGTCCTCGGGAAA

AAGAAAGGGGCACCGCGCGGGTGCCCCTTCAGGGTGGAGATGCTGACTCTTGCTACGGTG

ATGCTCAGTGCGGCATCGACAGGATCGTGATGCCTTCCGGGCGAACGCCCCAGCCCGAGG

TCACGCGCAGCTCCTGCACTTCGGTGATGCCTCCGTCCGGGATCGGCGTCGGGATCTTGA

TCGGCGCCGCAGCGTCGGCATACATCAGGTTCACCGCCTTCATGTTCGGCGTGATGTCTG

CGGCGACGTTGGTGTTGATGCCCGGGATATCCGGCTTCTCGATCTCGGGGATCGTGAGGA

TCACCGCGTCCGAGCCGCCAGCACCCTTGCCGATCAGCGTGTCGTCGAAGTACCACTCGA

TCTCGTCGCCCATTTCCTCGACGACGTTCTGCACGACCTGGCCGACCGTGGCCGTACCGG

CGCCGGGGCGCTGATACTGCACGACCTGCACGATCGAGCCGTATGTGAGCTGCAGGAACA

CGCGTTGCGGGCTGACGATGCGAATCTTGCTCTTGACGTTGCCGCCCGACTGGAACATGC

GCATCTTCAGCGACACGATCTGCGCGAGGACCCACAGCGCCATTTCGCCGTTGTCGTAGG

TCGACACCGTCGTGTTGCCGTAGCTGTCCGGCGGCAGAGTCACGGCCGTGGCGCCCACCG

TGTTCATCAGGCCCTCGCCGTTCGCCGGGTTGAAGCCGTACAGCAGGCCCGTGCGCATCT

GTTGGAAGATGCCCTGACGCTGCGCGAGATCCTGCGCGGCCGGCAGGCCGACCGAGTACG

CGGCGGCGGCGGCCGTATCGTGGTGGTCCCACATCGCGCGCGTGCGGATCAGGTACGTGG

CCGTCGAGTAGTACGTGGCGGCCAGCGTCGCCGACGGCAGCAGGTTCGGCGCGCCCTGCG

ATGCCTGCGTTTCGGTGCGCAGGTCGAGCGCGTTGATGTAGACGAACAGGTCTTCGCTGC

CGATCTTCACGCGCGGCTTGCCGCCCGGAAGCGCATTGAAGGCGCCGGAGGCCTGTGCGT

AGGTAACGATCAGCTCGGGCTCCGAGAAGCTCGGCGCGACCTTTGCCTGGGCCGGGAAGT

AATTTGCCATGTCGGAAACCCCTTAGATCTGGATGATCGCAGCCGCACCCTGGGTCCAGG

TGAGCGCACCGGTCCCCGAGTTGTAGCTGACGATCTTGCTGTTGGTGTTGACGGACAGCA

CCTTGCACGCGAGTGCGCCGGCGCCCGAGCTGTACGTGACCAGCTTCTGGTTCGTGAAGT

CCCACGAGACCTGTTGGTTGATCGCGCCCGTGTCGAGGTTGGCCGCCAGCGTCGCATCGC

ATTGCACCGCGATGCGCGCGTTCGAGCCCGTGCGATAGAACATCGCCGTCATGCCCGCGC

TGAGCTGCGGCACGTTGTTGCCCGGCGTCAGGATCGCGTTGTACGACCGGTTGATGACGG

TGAAGCCCGTCACACCGGCATTGTTCGCGGCGATCACCAGCGAGTTGCCGAGGCCGTTCT

GGTTCGGCGGCGCGACGTTCTCGGTGACGGCCATGCCGCCCCAGATCGGCTGCGTGACCG

ACGCGGCGATGATCGCGCTCGCGAGCCACATGTTCGAGGACGGGTCGTCCATGACCGCGC

CCTGAACATAGCCTTCCGTGTCGGTACGGAAGGTGCCAGTCGGCGAGCTCGTCACCATCG

GGTTGAACGAAATCGACATGGCTTATGCCCCCTTGGCTTGGCGGTTGAGCTTGCAGACGA

CGCCCGGCGCAGTGAAGTGCTGCATCCAGGATGCGATGTCGCCCGTGAAGCGGGTGATCT

GACGGCCCGCTTCGTCACGCGAGACGATCGGGATGAGACGGCCGGCCGGAGCCGATGCCG

GATTGCGCGCGGCGACTTGCGCATCCGCATAGATCCGATCCTCGACCAGGTTGAACGCGG

CGCCGTCGATCGCGTCCAGCTTCACGCCCTTCATCTCGGCGCTATGCGGCGCGAGCTTCG

AGGCAAGGCGGCGACGGTAGTCGATCGGGCTTTCGCCGTGCAGCGGCGCGCTCGCGCTCT

GACCGAACATCTGCATGACCGAATCTGCACGCATCTGCGCACTGGCAAGCGCATCGCGAT

CGGCCGTCGACAGCGGGGTCGTCAGCGTCGTGAGGCGGCTGTCCATGCGCTGGATCTGCG

CGCGCAGGTCAGCGTTCTCGCTTTCGAGGCGACGCTGCGAGTCGGCGCGAGCGGCGGAAT

CCGCGCGCTCCTTCTCTTCCTTCTCGCGCTTTTCCTTCGCTTCCGGCGTTTCCGCCGAAT

CCGCGCGGCGCTCGTCGCGCTGCTCGGCAGCACCGGCATGCTCCGCTTCTTCCAGCGCGC

GCGCAGCAGCATGCTCGTGCGACAGCTCGGCAGCGCCTTCGCGCTCGGCAGCACCGGCAG

CCGAATCGGCTTCGAGCGGCTTCGCGGGCATCTCGTCGCCGCCCTTGTTTTCGATCGCGT

CCATGCGCTTGATCAGCGCATCGGCCCACGCCGGGATTTGCTCTTCCATACCATCCATTT

CAGGATCTCCTGTGTTGACTCCGCTGGGCTCGCCGCCTTTGTCCCACACGCCCTCTTCGC

AGATTGCGAGGTGGTCGAGATAGGACGGCTTGCCTTCAATGAGGACCGATTTACCGTCGA

CCTCGACGGCTTCGGCTGAGCCCGCGTCGCGGAAGATCACCGCGGGACTGGTCGACGCGT

GCGACGTCGGCATCAGCCGGGCCGCGTCATCGTCGAATACTTTCGCGACGCCCCGCACTT

CGGTCTCGGTGAGGTACGGCAGGAAGATCGTGCCGATTGACCGATCGCGGTACTCGTCGC

TGTTGAGGATTGTTCGCTTCGGATGCTCGAAGATCACCGGCAGCCCGTTGCACCGCTGCC

GGAATTCCTCGGTCAGGAAGTTCTCGGGCGGCCGATACACGAACTCGTCGTGCTCAGTGC

GGTAGCTGGTGCCGGTGCCGGTGATGCGCAGGTCGAACAGCCAGACGTTCTCGTAGCGCT

GCGGCGACAGCAGCTCGCCAGCCGCCATGCGCTTCGCGATGTCGAGCTCATTGCCGGTCA

GCAGCTCGATCGTCTGCGCCACCGCCGGGTGCATCTTCTCCGGCAGGTCGCCGGGCGCAG

CCCACTGCCACGCCGTATGCTCGTCATTCAGGACGGGCTTGAATGGTTCCGGGACGTTCT

GCAGGAAGCAGGTGTACTCGCCCGCGCCGCCGGGAATTGCGTTGCGACGCACGGCCCAGC

GCAGACCGTCCGGGCAGCCGCCGATCTCTTCGACGGTCTCACGCACCGCCGCCTGCTCGG

GCGTTTCGTCGCCCTCGGCGTGTCCCCCAGGCTGCTCCCACTCGCCGGTGTCGCTGCGCT

GCACGAGCAAGAACAGTGGGCCCGGCGCGCGGAAGAGGATGCCGGCGCAGTCAGCCGACG

TCTGCGCGTCTGCGCGCGCCTTATCGGCATTTACAAACTCTTCGCCGACCGACTGCGGAA

TGCCGAGCGTGCTGTGGCCGTGCGCCGCGGCTTCCATCGCGCGGTGCTGCTTCTCGCTCA

CAGTCGGCATTTCAGGGTTTCCGGATTCGGGTTTCTTCGAGCGCCCGCCGGCCCTTCTCG

GTCAGCATCTCGGGCGGCAGGTCGCGCAGGTTGTTCACGTACACGCCGTAGCAGCGGCAG

AAAGGTTCCTCGGCCGGCTGCGTGATCTCGTCGAGATAGCCGTCGCCCTTCGTGATCAGC

CCTTGCTGAAGCGCCCACGAGCCACGCACCACGTAGAAACGCTTGTCGCGCTCCTTATGG

TCGGGCCGATAGTCGTAGCCGGCCTGACGCCAGTGCGAGCGCCAGATCATCGCGATCGCC

TGCGTCTGCTCGGCGATGACCGCGTTGATCGACGACATGAGCTTGTGCCCCTGGTCGATC

GAGACGCGGCGCTCTTCGTAGCGCAGCTGACGCATCGACTTCGCGATGGTCTCGCGCACC

TCGGGCTTCTCGACCGCGCGCGAACCGCCGGCGGGCACCGACGATACCCAGCCGGCGAGA

CGCTGCAGCGATTGCTCGACCGCGCGCTCGCGATTCAGCTTGATCAGGTCGACACTCGCG

CGCACGCGCTTGTCGAGCTCTGGGCGCAGCGCCGGCGTGATCCGTTCGATCGTGAAGCGC

GGCACGCCTGGGTGATAGCGCAGCGCGCCAGTCTTCGACAGCGTGCGATGGAACACCGCG

TCCATCGCGCTCTGCATCCGGTTGCGCATCTCGGCGTCGGTCGGCAGATCGGCCATCGCG

GCGAAGCGCAGTCGGCGCAGCCATTCCTGCAGACGGGCCGGATCGTCGTAGCCGTATTCC

GCGATGTCGCGAATGGCCTCGGTCAGCACGTCGTGAAACGTGCGGTTGATTGCGGGGCGG

ACACTCATCGGCTACTCGTGCGACGATTCAACGATCGGGTGCGGCTCGGCCATCGGCTGC

GGCGGCACGTAGCTCGCGATCTTCTCGTAGTCGAGCTCAAGCGGCATCGAGAACATCAGC

TTGCGCTCGTTCATCACTTCCGCCAGCCAGCAAGCCGCCGTAGCCTTGCTCTCCGGATCC

AGCATCGGATCGAGCACTTCGACGCATGCAATCGCAGCCTTCGTGATGATGTCATCGACC

TTGACGCGCTCGCTGTCGGGTTCGACCAGCAGGTTCGGCCAAGTAGCGGTGAAAGCATTT

TTCCACTCGTAGAAGGCCGTCTCGTAGGGCATCTGGCCGTACAGGCTTGGATGCTTGCGC

TGCATCGACGCGTAGAACTCCGGACTCCATGCGCGGCGCATCACGATCGGGTCGAGGAAG

TCGTAAGCGGGCCCCATCTCGATCCGTACCCGGTCGATGAAGCGCGCGATCATCTTCGCA

TCCTCGGTGCCCTCGCCGAACCCCTCGGTCAGCGTGTCCTGCGCGATCATCACGGCCGGC

ATCTTCGCCGACGTCGCGATGTTCTTGACCACGTTCATGCGCGCGAACTCCGCGGCGTCG

CGGATGTTCTTCAGGTCGATCGACTCGATGCTTTCCTCGAGGCCGATCGACATCACGTTG

CCGGTCTTCGCACCCTTCAGCATGCGGCGCTTCAGATTGCCCCATGCCAGCGCAACCTTG

TCGACCACCGAGCCCGGCGACTTCATCTTGTAGACGAGCAGGCCGGCCTTCTCGATGATC

TGGTTGTCCGTGATCATCGACTGGACATACGACTTCATCGGGTACAACGCGCGTTGGTAG

ACCGACCGGCCGACGAAGCCGAACGCGCTGTTCGTCCACTCGATGTAGATCGGCGCCTCG

TTCAGCGCGATCACCGCGCGCGACGGATGGTAGTCGTGGTTCGCGACCTTCAGGAACTGC

GGCTTCTGGAAGTCCGGCGCGTTTGGGTTCTGGTTCAGCACCAGCGAGCCGGCCGTGTTC

AGCGGATCGAGGATGTTGAAGTACAGATCCAGCTCGTGCATGCGCTCGATCGGCAGCGGC

TGATCCGTCGGGAACTCGCGCGCGCCGACCACCAGCGAGGCGATGCCGTAGACGCGTTTC

AGCGTCATGAAGCTCTTGATGATCTCGTCCGCGCCGACGCCGCCGAGCTTCTTCCATTCC

TTCCGGAAGGCCTGCACGAGATCGTCCTCAGGCGCGCCGGGGATCGTGATCTCACGCTCC

TGCGATAGCGCCTCTTCATACGGCGCCTCGGCCATCTTCGCGCCCAGCGGGTGGTAGCTG

TAGATGACCTTGCACATTTCGTACGACGGCGGCGAGCCAGGCTGCAGATCGTCGGCGGTC

AGAAGACGCATGAGCTCGGCCGACATGGCCGTGCCGACGTTCAAGCTCGCCTGCGAGCTC

TCGTCTGCGTCGCCGTAGAAACCGCCCATTCAATAGCCCTCAGAATCGCCGAGGCTGATC

GCCACGCCGTAGGTAAAGGTGTCCAGCAAATCCATGTGGTGCGGCGTTTTCGTCCCGAGA

CGGAAGCCGCACACCTGCGAAATCAGGTGATTCCGCGTCTGGCCTTTGTAGTTCGTGATC

TTGTCGTGTGCGTAGCGACTGATCTTCACCTCGCCGCGGTGCACGTAGCCGCTGACCGAC

AACGCGCGCCCTTCCTTGCCGAGATCGACCAGCTTTTCCTCAATCGGATGGAACGGGAGG

CTGCGCCGGGCCGCCTGCTGCAGCAGCACGATCCCGCTCGCCTTGTCCTCGATCCAGCCG

CCGAGGCTTCCTTGGCGCGCGCCGACCTGCGCCGCGAGCTCCTCGCAGCGCTGCGCCACC

GTCGGCAGCCAGCTTTCGAGCAGTGCGCCCTCGATCTGCAGCACATCCCAATCGAGGATG

ATCAGCGGCGTGCCGGCGATGATGTTCCGCGCGAAGTACGTGACGGCCGTGCCGTCGTGC

TCGAGACCGTCCTTCAGCGCGGTATCAACGACCGCGAAGACCTGGTCGCAGCGCGTCGGG

TAATCGACTGCCTCGCCGTCGACCAACATCGACGATTCGGAGAAGAACGCCGCGCCGTTC

CAGTCGACAAAGTCGGCGAGGTATTCCTGCTGGTAGACCAGCGCGGGGTATTCGTCCTTC

AGCTTTGCGACCGCCTCCGGATCGAGCATCGGATTCGACGCCGTCGGCGCATGGAACTCC

TGCCAGCCGAGCGTCTTGTCCGTGCAGGCTTCGTAGAAGAAGTTGTCCGGATCGATGCCC

TTCGGCGTGCCCGCCATCACGGCATGACCCTTCCGGTCGAGCAGCGTCGGCGCGATCGCC

TGTTCCCAGATGTTCCGCAGTCCTTTCGGGACAAGCGAGCCCTCATCGATGATCACGCGA

TCGTAGAAGCGCGAGCGGCCCGCGTCCTCGTCCTGCAACGTCCAGAACTCGACGCAGCCG

TCGCGCCGTGTTTCGATTACCTGGTCGATCTTCGACTTCGCGACGACGACCGGCTGGATC

GTGCGCAAGATGCGCTTGTACGTCGGCAGGTTGAGCTTGTAGGTCGGCCCGAACCAACCG

ACCTTGAGGCCGTTGTATGCCCACTTCGATGCGCAGCGCTCGAGCAGCGTCGTCTTGCCG

AACCGTCGACCGCAGCGGATTACGACGCGGCGGCTCTCATTGAACGCGCGGCCGATGTCG

GCCTGCTTCGCATGAAGCTCCTGCAGCTTGACGGATTGCTTCATACGTCGGGGTTCGGGT

CATCGAGGCCCGGGCCGCCCTCGCCGCCTCCGCCTTCAGGGTCCGGCGTATTGCGCCATT

GCGCCTTGCGCCGGTTCTTCAGCCAGAAGATCGCGGCGGCCGTGTCCGGCGGATAGTGCT

CGGTGTACTCCTGCGATACGACCTTGCCGCCGATCACGAAGAACTTCACCGCGGGGTGGC

TGTAGCCAGTCGCGCGCCGAAACAGCTTGTCCGCGACCTCGGCATCCGCCAGATCCTTCC

CTTCTTTTAGGGCCTGCAGAAAATCTGGTTGCTCCGTTTTCCACGAGCCGATCGTGCGCT

CGGACACGCCGAAGAAATCAGCGAGTTCCTTGTCGGTCGCGCCTAAGCGGCAGAGCTTGC

GCGCCTGGTCAGGGAATTCCTCGCGGTACGAGCTGGGTCGGCCGGCAGCCTTCGCAGGCT

TGGCGCCCCTGCGCTTGGCTGAATCGTCCATGGTCGGCCCGTGGGTTGCCCGCGCCTGCC

GGTTTCACGACGGAGAGGACGTTGCCATCGGATCGCCACATCGCGGACTGCGGGTGTTTT

TGCGCACTGGCCCGCTTGCGCTCGCCATTGCGGACGTAGAAAAGAAAAAGCCCGGACGAG

CCGGGCGAATCACGCGGGGGAGCGTGATGGAGACATCGAGGAAATGAAAAAGCCCGCTGG

CTTTTGGCTCAGCGGGCTTTAGAGACACTTTTGACGTGTATCGATTGACGCGGATTATTG

CCGGTTTTTTCGGAAAATTCAAGCAATCGCGAAAAATTTCCTTCTACGCGACCGCTTCGC

CCTTCGCGAGAATGCCGAGATCCGCGAATCGGGACTCGACAGCGGCCCATGCGACGGTCT

CGACGCCGACCTCGTTGGTCTTGCGATTCCCTTCGAGCCAACGGCGCACCGCGGCGTTGT

GGTTACTGGCAGTCTTCACATTCGCCTCGCAATCCTTGGCAATGTCCTCGAGGTTGCGCT

TCACCCCGAAAAACTTCTCGATGATCGCCTGCCGCACGCGGAAATGCGAAAACCCCGAGC

AGTAGGCGGTCGAGGCTTTCGTCAACCATCCGATCGCCGCCTTCCATTCGAGGTTCGGCG

TGCTGCCGCTGCAGCATGCGCTGCCGCACGAGCATGGGAGATCATGCGGAGCCGCGCGCG

CGACAATCACCGACAGATGCAGTTCCGGAAGCTGTTCGAGCTCGCGCCGGATCATGCCGG

CCTGCGCCGCGCCTTCGAGGCCGACCAGCCCGATACCGCCGCTGCTCGGCGGCCGCAGCC

GCTTCGCCATAAGCGTTTCCCCGTACTGCTGCGCCGAGTAGCAGAGCGCGAACCGTACCG

CGTCGAATGCCGATTTGAATTCGATGTTGTCCAATTTTTCAGTCCTCAGGCTCGCTGCAG

ATTCAGTTCGATGGCCTCGATGCGCACGCCGGGCACGCGCGCGTAGCGCTTCGAGATCCA

GAGATCGACGACCTGGCCGTCGTCGATGTACACCACGCCGTTCATACCGTCCTTGAGCGC

CTTCACGATGTTGTCGGCGTCGGGCTTCTTCGTCGCACCGATCGCTCCGGCGGCGGCCGC

TTCCTGGCGCTTCACCGACCAGCTCGCCGGAATCGGCAGGCCGATGTGCACGATCAGGCG

GATCGGGCCGGCGTAGGGTTCGGTGCTGCGCATGGCGGCGCGCGCGGCCATCTTCACGAG

GTTCTCGTACCGCTCGGTCTTATCGGGCGTGTAGGTCGTGACGTGCGTGCCGCGGCGCGC

GAACTTCGGCCGGCCCTTTGCGACCGGATTGCCGGGCACGACGAACTCGACGCGACTGGA

GACGACCGGCGCGCCGATCAGGGATTGCTGAGTCACGGCAGCACCTCCCATGCCCACATG

CTGACGCTGGCAGCGACCAGCAGGATTCCAGCAAGGAACAGCGCGGCCCAGCACATTCCC

CAGAACTCGGAAATCCAGTTCGAGTTGCGGAGGCGAGTACCGAGCCAGCCCATGACGATG

AACCAGATGCCGACCGCGCTCATACGCGCACCTCGCGCATCGATTGCGCCGCCGTCTCCG

TCGGTTTGTGCATGTCGCAGTAGTCGCGCCCCTTGTGCGTCCAATGCGCCTTCACGCGCG

GGCCGCGCGCCGAGCATTCGCAGCAGTAGCGGTGGCCGCCGGCCTTGACCATGTCCTTCG

TGATGCGCTTCATGCTGTCGTCTCCTCCGATGTTTCCTCGCGCCGATCATTGCCCGGCAT

GTATCCGCTGACATGCGTCGGCCCGATGACACCGCCGACCGGGTCTCGATGCGCCGGCGC

CCCGCGGCCAAGCGCCGACGTCTGCTCGATCAGGAACCGTTCGAGCCGCAGCAGCCAGCC

ATAGGCGTTCTTGTCCGCATCGGTGCGGAAGGCCAGATCGTGGCCGTCCGCATGGCCCCG

CAACTCCTGCCGGCTCAACCGAATCGCTTCCTCGTCGCGACCGCGCAGCGCGATCGTGAG

ACGGCAAATCGTCGAAAACTTCTCGCGCAATGCCAGCGTAATCGCCGCATTCGCGCTGGG

CGGCTGCTCGTGATGGCAGAAGCACCACCACTGGCCGCCGCTGCCGAGGGTACCGAGCAG

CGGGCACCCATACGCGGAGCACATGCCCCATGCCTGTCCGGAATCGCTCATGCCGCAACC

TCCCGCGCCCGCTGGCGCATTACGCTTTCGCATTTTTCGAGCAACCACGCATGGTCGCGG

CCCGCCGGGCAGACGATCCCGAGCTCGGATGCCTTGCGCTCGATGCCAGCCGGCGATCGC

TTCCACCCGTTGTCCTCGCGCTTCACCGTCGGCCGTCGAACGCCTTCGAGCTTCGCGCGA

ACGAATCCGGCGTTCACCGGAGCAGGGTCATCCGTCGCCAAGCGATCGGCCACCGCGGCG

TCATACGCCTTGCGCAGCTCATCCGGCGTGACGCGCATTCCGGCAAGGTCGATGACCTGC

TGCTGGCTGGGCGTCATGTTTCGCGCCGCCTTGCCGCGCTCGCGCTCCCAGCCGATGAGA

CTCATCGAAATTCCGGCGGCGGTCAGCACGCCGTCGATCACGTGCGCGTGCGAAGGTGTA

CCGCCGTCGGTGTTAGAACCTATGGTTTTAGGTTTACTTCCGGTTCCGGTTCCGGTTCCG

GTGTCGTCACTCCCATGTGATTCCCCTGTCTGTCCCGATGTTGTCCCGTGGGACACATCC

GGGACTTCTTCGGACTGCTTTTCAGCCTTCTTTCGATCGCGCCATTCGGCTTTGCGGTTG

CGTTCCTTGTCGCGCGCGGCGAGCATTTCATGCACGCGCGTGACGATCGTGTTGTGGTAT

AGGCGGCCATCTTCGGCCCGCCACCAGCCGCGCATGAGCTTGTCGCGGTTCTTCACGAAG

AGGCCCGTCTTCATGCCGATACGCGCGGCGATCAGCTCGTCGTTGTCGGGCAGCGAGCCG

CATGGCTCCTGCTGCCACGCAGTCGACCAGAGCATGAGCAGCCACGGCCGCAGATCGGCC

GGCGTCAGAGCCCATGTATCGGATCGCTCGATGCGCTCGAGATCCAGCTCGAAGCGCCAG

CCCTTCGCGCGCGTATCCGGCGGGTATGGGATTGCGGCCACGCCTATCTCCGCATGAGCC

AAGCGAGCAGCGCGCAAAGCACGACGATGAGCGCGATGTAGGCGATGAGGGCGATTTGGA

GCTGGTTCATGCCACCACCTCGTCTTCGACGTCATCGGTTACGGGCACGCCGCTGATCGG

GCGAAGCCACGAATCCTTCACATCGAACTCGGTCGCCAACACAATTGCGCCAGTGCTCGG

AATGCGCGTTCTCCTTGAGGAACGAGTTCTACATTCCCATTCGGGCGAATCAGGACTATC

CCAAAATTGGATAGGGGTAGGCGCGAGTACCTCGACGATTAGGCCGATATCCTCCAAGTC

ACCTTCGTGATCGACTCGCACCACGATCGCCAGATCACCCGGCTTGCAGTTCATACGCCA

CCCCCATACACGCCAAACGCGAACGCGATCAGCGTGCGCACCCACATGTCGATGAAGAGT

TCGATGATCATGCGACCCTCCGCGGTCCCTGACGCATCTCGGTCGTCTGCGCGCGGATCC

GCTCGAGCGCATTCGTCGCCTTCAGCACGACGTCCATCGCGCCGTTGATCGCTTCCGTCA

GCTTCACGACGTCGTCTTCGGGAACCTTGCGATCGGGCCGCGCGTGCAGTGTCTCGTCGC

AGATGTAGTACAGCGGGTCGTAGCAGTTGCAGAATTTCATCAGCGCCAGGACTTGGCCGA

ACTTGAAGTTCTCGTCGCCTTTCGGATTGAGGCAGGCCTTCAGCTTTGCGTAGGCACTCT

CGGGCTTCATGTGCGGCCAGAGATGCAAAGCGACCTCTTTGAACGGCTTACCGCTGTTGC

TCACCATCAACTGGAACGACTCGAATTCGTCTTCGTAAAACAATTTGGTCTGCATACCTT

TACCCCTTTGGCCCCTACCGCCCCCGCAAGAAAAACGCGCTTTAGGGTCCGATAGGGCTC

CGCGCTTTGGCGAAAAAAAAGGATGATCAGGGTCATCCGAACAAGAAAAAACAATGGGCT

ATGCGCTATTCACACAACCATCTTCGAGATCTTCGAATCGTCGGCAATTCGGCCGACGGG

AGGCTGGACGTCGTCCGATGCCTTCGCTCGCTCGATCAGATCCGCAAGGAACAGATCGGG

ATGCTGCAGCTTCACCTCTGGCGGAATGCCGCGATACTTCCAGTTGTGGACGCGTTGCGT

GCCTCCCTTTTCGGCGTAGCCGAGGAGTCGGGCAACTTTCGAGGCACCTCCCAGGCGCTC

GATGAGCTGCCAGTCTGGGTGCGGGACGGTATCGTTCGTATCCATGCCAACATTAAACAC

CATGTTTAGGCCATTTGCAAACATCGCGTGTATCAACAAGACGTTTACTCGCGAGAGAAT

CGCGCCATGGAAAAAGTGATGCACGAGACGGCGCGCCGGCTATTCGATGCGGCCAAGAAG

GTCCGTTCTGATATCGAGACGCCAGCCGACCTGGCGCGCGCGCTCAACCAGAGCGAGCAG

ACGATCAACAACTGGTCGTATCGCGGGAACGGGGTATCGAAGCAGGGGCGCCTGCTAGCT

CAGAAAGAGCTGGGTATCAGCGCGACCTGGATTGAGGAAGGCGTCGGTGCGATGCTCACT

GCCGCTGAGCACAAATCCGGAACGACCGATGCGCCGGGCATGCGCCAAGATGAGGCGCTT

ATTAAGCGTTTGCTCCCAAATGACAAAGGTAACGTAGTCGTATGGGAGCGGCCGGAAGAT

CTCGAGCCCGATGAGGACCGAGTCTGGATCGACCGCTATGACTACAGATTCTCGGCGGGG

ACAGGCTTGATCCAGTGGGAGATTCGCCAGAAGAAGGCATTGCCGTTCGATATCGGCTTT

TTCAAGGCGCTCGGCGTCAAGCCGCAGGATTGCAAGCTCGCGCAGGTGCACGGCCCAAGC

ATGGAGCCTTACCTCTTCAATCGCGACCTGATGATGATCTGCACCACGCGCAACCAAGTG

CGTGACGGCCGGATCTATGCGGTGTACTTCGAAGAAGAAGCGCTCGTGAAGCAGGTCTTC

AAGGAACCTGAAGGTGCGCTACGGCTGCACTCATACAATGCCGATTTCCCGGATCGCGTC

ATCGCGGCCGACCAGCTCGCGAGCCTTCAGATCGCCGGCGAAGTCATGTATCGTTCGGGA

TCAGGGCCAGCCGGCGGCAATTGAGGTCAGCATGAAACGTCTCGTTCCCGCCGCCGCGAT

CATCTGGGCATTCGGTGCGCATGCCGCTCCCGTTCCCGATGACATCGCGGCGAAATGCAC

CGATTCGGCATCCGCGTTCAGCTTCGCCGCGACGTTCCGTGACACTGGGATCTCGCCTCA

GGAGACGCTCACCCGGATGAAGGCGCCTTCCTTCCGCCGCGGCTTCCCTGATGGCGCGCT

GAAGGAAATCATCAATATGGTCTACTTCGATCCGGATCTGTCGAGGTGGCCGGCCAGCCG

CATTTTTTCGGAGGTCTCGCGCGACTGCATGTCCCCTCAACAGCAATTCGCGCCGCTTCA

ATAGCGACAGCCAGCCCCTTCTCCAAGCCCGCCGCGCGCGGGCTTTTTTGCGCCCTCTCG

CACCTCTCTGCCTACTCTACACAAAAATATAAACACCACGTTTGACAGTCGCATAAACAT

GGTGTTTAATGAAGTCCATCGCAGCACACAACGCGCTGCGTCACCGCCCCGGCGGATCGC

TCTTTAAAAATCGAAGGTACGCAGGAGCCTCCCTCACGGGACTCGCCCTGCCGGCGCGAT

CAGCGTCGTGAATCAGGACAGACGAACCGCGCTAGGCCGATGCTGGCTACCGGACAGAGA

TCTGAACGAACCTGATGCAAGACAGCCAGCAGCACGTGACCGATGGCTTCGTAATCGGCA

CAAAACCTCGCGCGGCCCGGAGCCGGCACGACCGGAAGTAGCCGGGCGCGCGAGCGGTAA

CTGCCCTGATGAGCGGATATGCAGCGATGACGGCCGGGCCCCGTCATAAACCCAGTTTTT

GAGTCTGAAGACACGCTTGCCACGCGAAAACGCTGCCTCATGCGAGCGCTGCGTATCCGC

CCATCAGTGCAGTCAGTACAGCCGGTCATGTCTCCCGGCAAACCTGTTAGGAGTGCATAT

GCTCAACCCTCAATTAACCGAGCGAGCGGCCGAGTTCTGGACCGATCGACAGCATCAGCA

GTTCAACGATGCAGCCGACGCGGAGGCCGCGCGTGCCGAGCTGGTCGCGCAGATCGCGAA

GGAACGCCTGAAGGCCAAGATCGCTGCACTGTCGGACGACGACCTCGTCGGCGGCATGCA

CAGCGTGACGCAGCAGAAGCACGCCCGCGCACTGCGCGCCGCGTTCCGCGAGTCGCCGGA

AGCGCTGGGCGACTTGGTGATGTCGATCATTGTGCACGCGATGAGCGAGGACGCCGAGCT

CGAGGCCGAGCGCTCGCTCGATACCGATCGACCGCGATTCGCGACGACGCTCTGCTCGTC

ATGCGGCCAGAAGTTCGGGTCGGGAAGCGCCGGGTTCTCCAGCTGCGCCGAACACATCGG

ACGTCGCGTGCTCGACGACTGACTAACTGCGCCCGCTACGGCGGGCAATCACACCACACC

GAGCGACCACATGGAAAATATCGAATACAAGCCGGATGCATTGGTCGTAGACACACACTC

AACCGAGATTCCGTTCCGGGTCATCAGCACCGCCACGAAAGAAGACGTCGGCTACTTCTA

CGACGAGGCGGACGCATGGCTCTTTGCGGCAGCCGACAACCTGGCTAATGCCCTCGAGAT

CATCGCGCAGGACGACGACGCGGCACGCCACAACGGCAAGCCGCTGCTCACGTCCAGCGT

TCGCATGGCGCTCGATGCTGCGCTGATCAAGGCCGGCCGCAAGGAACCGCCGGCGCCGGT

GCGGCACGTGACGATCGCGGGGGTGGATCGATGAGCCGACGAGATTACCCACGCATCGGG

ATGAACAGGCAGCGAACGGGCGCAAAGCTCTGCAACTGCTGCGGCACGAAGGCGCGTTGG

CAGGTCGAGTTTCAGGTCAGCTGGTTCCGCGGCGAAGACGAATGCTTTCTGCTCTGCGAC

ACGCATCACGCGCTCGTCACAGACATGAACCTCGCCGAACTCACTCGCCTGAAAGACGAA

GAGAACGCCAGACGCCGTTCGACTGCCAAGGTGAACTCATGATGCGCACCCCTCTCAACA

GCCTAGCGCCTGTATTGCGCAATTACAGCCGATCGGTTGTATCTCGCCCGGCTGGCGATA

ACGCACTGCTGCGCGCGGCCGAGCGGCAATCCGCTGCCCGCTACATCGCCGAGGGTGCCG

CATGGATGGCGGCATTCGGTGTCGCGATCGGCTTCCTCTGGTTCGGCGTCGATCTCGCTG

GGCCGTATCTGCGGAGTCTCGGATGAAAACCCTGCTTCGCAAGATCGGCGAGCTGTTCGC

CCTGTGGATCGTCGTCGCCACGATCCTATTCGTCTTCGTCTGGCTCATCGTGCCGAAGCT

CATCGGCGCGCCGGACGACTCGCTTCCCACCGCTGTTTCCGTGCCGACGAGGTCCACATG

AGCCGCTTCACCGATCACGCCGAGCGCTTCGAGCGCCGGCACCCGCGCGACGTGCGCGCA

CTCGCCGTCGCGATCCTTGTCGCGGCCGCGCTTCTCGCGGTCGCCGTCGACAGCGTCATG

AAGTCTTTCGGCATCCAGTAATCCCGCGTCTTCCAACCAAGAGGATTCACGAAATGAGCA

CTACCGCACTTCAAGCAACCTTCCCCGCGCCCGATCTGAGCGAGGGCGAGATCTATGTCG

GCGTGATCGCCAACACGGCGGGCGAACTGCATCACGTCGTTTTGCTGCCGGGCGACAACG

AGGGCGCCAGCTGGCAGGACCAGATGAACTGGGCAAAGTCGGTCGGGGGCGACCTTCCGA

CCCGGATCGAGCATCTGTTCCTGCTGACGAACCACCGTGGCCAGTTCGAGCGAGACGCCT

ACTGGTCGAACGAGCCGGACACCGATCCCGGCTATTCCGGCTGGGCCTGGTTCCAGTACT

TCGACATTGGCAGCCAGACCAGCACCCGCCAGAGCTACGAGTTGCGCGCCCGCGCCGTCC

GCAGATTGTCCATTCAGTCCTTTGGTAATTCGGACAGCGCAGCCCCCTGCAGCAGCGAGG

TGTCGGCATGAGCACCATCGAAATGCAGCCGGTCGAGTCGTCGCAGATCTACAGCATCGG

ATACGACGCTGAGAGCGAGACGCTCGCAATTCGGCTCAAGAACAAAGCGAACGACCCGTC

GTCGCTCTACCACTACTCGCAGGTCACGCAGGCCAACTTCGACGCGTTCAGGAATGCTGA

ATCGATCGGCTCCCACTTCTACAAATTCATCAAGCCGTTCCCGGAGCGCTTCCCGTACGT

GTGCATCGAGAAGATGCCGGTCCCGGCGCCGATCGTGCCGGCAACCGCGTAACGCCCGCT

TCGCCACCTTCCACCCATTCCCAGAGGATTTCCATGTCCACACCCGCCATCGTCGAGCAG

TCGCGTGCGTCCGTTCCGGTTCGCGCCGGCTTCTTCGATCTCGAGGGTTTCGAGCTGCTG

CAACGCGTCGCCAAGGCATTCGCATCGTCGTCGCTCGTCCCGCAGCAGTACCAGAACAAC

GTTGCGAACTGCATGATCGCGCTGAACCTTGCGAGTCGCCTGAAGGCCGATGAGTTGATG

GTGATGCAGAACCTGTACGTCGTGCACGGTCGGCCCGGCTGGTCCGCGAAGTTCCTGATC

GCAACCTTCAACCACTGCGGCCGCTTCACCGCCGTGAAGTATGAATTCTTCGGCGAGAAA

GGCACCGATTCATGGGGCTGTCGCGCATCGTCGATCGAGATCGCCAGCGGCGAGAAGATC

GTCGGTCCGGACGTGACGATCCAGATGGCGAAGGATGAAGGCTGGTACGGGAAGAGCGGT

TCGAAGTGGAAGACCATTCCGCAACTGATGCTGATGTACCGTAGCGCGGGCTGGATGATC

AACACGGCCGCGCCGGAAATCTCGATGGGCCTGCCGACGCAGGAAGAACTGCACGACATC

ATCGACGTGCGGCCGGACGGCACCGTGTCGTTCGGCGGCGTCGAGGAAGGCAGCGCACGC

GCGCCGGCCGCTGTCGAAGTGCCGCAGCCGAAGTCGAAAAGCGAGCGCGCCACCGAGCCG

CCGGCGATCGCGCAAGCTGATTCGGACGGCGTGATCGAAATGGCCGCCACACAGAAGCAG

CCCGAACCGGTCCAGCAAACCCGATCGACGCGCCGCGCAGTCGCTGACAACACGCAACCG

GCTGCGGCCGCCGCGCGCGAGCCCGGCGCCGACGATGAGCCGTTCGAACTCGACTCGCCG

GCCGCCGGCGAGCCCGTCAGCGACAGCGTGCTGAAGATCCTGAAGACGAAGATGGAGCAG

GCTGCGCTCGGCGAGGCAGATCTGCGCAAGCGCTTCGGCTTCGGCTACGAGGGCGTGACC

AAGACGAACTATCACGCCGCTGTTGCCTGGATCGAAAACCCGATGGGCGAATGATGACCG

CGCTTCTTTTCGATCCCGCCGAACACGCCTACACCGTCGAGGGCCTGCGCGTGCCGAGCG

TGACGCAGGTTCTCGCTCCACTCGTCGACTACTCGAAGGTGCCGCGCGAGACGCTCGAGC

GCGCGCGACAGCTCGGTTCCGCAGTGCACCGCATGACTGAGCTGTACGACCTCGACGACC

TCGACATGGACGATCTGGCGGACGAACTCCGGCCGTACCTCACGGCCTGGATCAAGTTCC

GCGCGGAAACCGGATTCGTGCCCGAGACGATCGAACAGCGCATGTTCCATCCCGCGCTGC

GCTTCGCCGGCACGCCGGATCGCTCGGGCCTGATCAGCGGCCGCCGCGCAGTGGTCGACA

TCAAGAAGATGCTGACGCTCGGCCCGGTGATCGGGCTGCAGCTCGCCGCATACCGCGAAC

TGTTCGCGAAGAACGGCACCGTGATCGAGGATCGTTACGGCCTCGGCCTGCGCGCCGATG

GCACCTACCGGCTCGTGCCGTACACCGACAAAAGCGACTGGCCGGTTTTCCTGTCGCTTC

TCACTCTCCGTAATTGGAATGAAAAAAATGGACACGCAACCGCTGGTGAATCTCCAGGTG

CCGCAGCCTGAGCAGACGCTGTTCAAGTCGGCAACGAACGCCCTCGAAATGGCGAAGGCA

TACGCGATCGACAGCGCCGACATGCGCGACTTGGCCGCGCGCGAGCTCACGAAGATCAAG

GGCTTGCAGAAGGACGTCGATGCGAAGCGCAAAGGCATCACGCAGCCGATCGACGCCGCA

AAGAAAGCCGTGATGGATCTGTTCCGCGCGCCGACCGACTACCTCGAGCAGGCCGAAGCG

CTGCTGAAGAAAGCAATTCAGGGTTACGACCGCGAACAGGAGCGCCTGCGCATCGCCGAG

CAGGCGCGCCTCGAAGAGGCTGCGCGGCAGGAGCGCGCGCGCCTGGAACAGGAAGCGGCA

GCGCGCGAAGCCGCGGCGCAGGCAGAGGCGCAGGCCATCCAGCGCCAAGCCGAACAGGCT

GCGGCAGCCGGCGATGTCGAGTCGGCTGCGCGCCTGAATGCCGAAGCCGAAAGCCGGGTC

GAGCAAGGCGCGGCCGAGGTTGCCACGCTGCAGACGACGGCGACGCTCGTCACGGCGCCG

GTCGTGGCCGCGCCGGTTCGCACGGCCGGCGTCTCGACGCGCAAGGTCTGGAAGGCCGAA

GTCAGCGACAAGCTCGCGTTGATCCGCTACGTGGCCGCCCATCCGGAATACGTCGACCTG

CTCGACGCGAACATGCCGGCCATCAACAAGCTCGCGCTCGCGCTGAAGGCGAACTGTCCG

CTCGACGGCGTGCGCGTGTTCGAAGACAACGTGATCGCTGCGCGAGCCGCATAACCACCA

TCCCACTCACCAAGACCCGACC

>Feature vB_Sb_QDWS

1 678 gene

gene gp01

1 678 CDS

gene gp01

codon_start 1

transl_table 11

product hypothetical protein

675 1400 gene

gene gp02

675 1400 CDS

gene gp02

codon_start 1

transl_table 11

product hypothetical protein

1584 1940 gene

gene gp03

1584 1940 CDS

gene gp03

codon_start 1

transl_table 11

product hypothetical protein

1971 2441 gene

gene gp04

1971 2441 CDS

gene gp04

codon_start 1

transl_table 11

product hypothetical protein

2456 2812 gene

gene gp05

2456 2812 CDS

gene gp05

codon_start 1

transl_table 11

product hypothetical protein

3156 4187 gene

gene gp06

3156 4187 CDS

gene gp06

codon_start 1

transl_table 11

product retron-type RNA-directed DNA polymeras

4264 5313 gene

gene gp07

4264 5313 CDS

gene gp07

codon_start 1

transl_table 11

product DNA cytosine methylase

5332 5733 gene

gene gp08

5332 5733 CDS

gene gp08

codon_start 1

transl_table 11

product host nuclease inhibitor protein

5726 6034 gene

gene gp09

5726 6034 CDS

gene gp09

codon_start 1

transl_table 11

product hypothetical protein

6024 6539 gene

gene gp10

6024 6539 CDS

gene gp10

codon_start 1

transl_table 11

product hypothetical protein

6584 6889 gene

gene gp11

6584 6889 CDS

gene gp11

codon_start 1

transl_table 11

product hypothetical protein

6886 7239 gene

gene gp12

6886 7239 CDS

gene gp12

codon_start 1

transl_table 11

product hypothetical protein

7236 8204 gene

gene gp13

7236 8204 CDS

gene gp13

codon_start 1

transl_table 11

product site-specific integrase

8397 8993 gene

gene gp14

8397 8993 CDS

gene gp4

codon_start 1

transl_table 11

product Lipase

8990 9454 gene

gene gp15

8990 9454 CDS

gene gp15

codon_start 1

transl_table 11

product hypothetical protein

9497 9706 gene

gene gp16

9497 9706 CDS

gene gp16

codon_start 1

transl_table 11

product hypothetical protein

9709 10323 gene

gene gp17

9709 10323 CDS

gene gp17

codon_start 1

transl_table 11

product hypothetical protein

10407 11480 gene

gene gp18

10407 11480 CDS

gene gp18

codon_start 1

transl_table 11

product minor tail protein

11599 12009 gene

gene gp19

11599 12009 CDS

gene gp19

codon_start 1

transl_table 11

product hypothetical protein

12040 12690 gene

gene gp20

12040 12690 CDS

gene gp20

codon_start 1

transl_table 11

product endolysin

12687 12890 gene

gene gp21

12687 12890 CDS

gene gp21

codon_start 1

transl_table 11

product hypothetical protein

12959 14011 gene

gene gp22

12959 14011 CDS

gene gp22

codon_start 1

transl_table 11

product putative O-acyltransferase

14004 15260 gene

gene gp23

14004 15260 CDS

gene gp23

codon_start 1

transl_table 11

product hypothetical protein

15601 16185 gene

gene gp24

15601 16185 CDS

gene gp24

codon_start 1

transl_table 11

product hypothetical protein

16288 17001 gene

gene gp25

16288 17001 CDS

gene gp25

codon_start 1

transl_table 11

product tail fiber protein

17016 17915 gene

gene gp26

17016 17915 CDS

gene gp26

codon_start 1

transl_table 11

product hypothetical protein

17919 19334 gene

gene gp27

17919 19334 CDS

gene gp27

codon_start 1

transl_table 11

product Baseplate J like protein

19331 19678 gene

gene gp28

19331 19678 CDS

gene gp28

codon_start 1

transl_table 11

product hypothetical protein

19691 20347 gene

gene gp29

19691 20347 CDS

gene gp29

codon_start 1

transl_table 11

product baseplate protein

20340 21311 gene

gene gp30

20340 21311 CDS

gene gp30

codon_start 1

transl_table 11

product hypothetical protein

21315 21593 gene

gene gp31

21315 21593 CDS

gene gp31

codon_start 1

transl_table 11

product hypothetical protein

21590 22324 gene

gene gp32

21590 22324 CDS

gene gp32

codon_start 1

transl_table 11

product hypothetical protein

22326 24050 gene

gene gp33

22326 24050 CDS

gene gp33

codon_start 1

transl_table 11

product lysis protein

24171 24794 gene

gene gp34

24171 24794 CDS

gene gp34

codon_start 1

transl_table 11

product hypothetical protein

24779 25225 gene

gene gp35

24779 25225 CDS

gene gp35

codon_start 1

transl_table 11

product hypothetical protein

25238 26560 gene

gene gp36

25238 26560 CDS

gene gp36

codon_start 1

transl_table 11

product hypothetical protein

26579 26887 gene

gene gp37

26579 26887 CDS

gene gp37

codon_start 1

transl_table 11

product hypothetical protein

26893 27852 gene

gene gp38

26893 27852 CDS

gene gp38

codon_start 1

transl_table 11

product hypothetical protein

27852 28286 gene

gene gp39

27852 28286 CDS

gene gp39

codon_start 1

transl_table 11

product hypothetical protein

28286 28744 gene

gene gp40

28286 28744 CDS

gene gp40

codon_start 1

transl_table 11

product hypothetical protein

28747 29265 gene

gene gp41

28747 29265 CDS

gene gp41

codon_start 1

transl_table 11

product hypothetical protein

29345 30370 gene

gene gp42

29345 30370 CDS

gene gp42

codon_start 1

transl_table 11

product hypothetical protein

30383 30979 gene

gene gp43

30383 30979 CDS

gene gp43

codon_start 1

transl_table 11

product hypothetical protein

30983 32830 gene

gene gp44

30983 32830 CDS

gene gp44

codon_start 1

transl_table 11

product hypothetical protein

32832 33668 gene

gene gp45

32832 33668 CDS

gene gp45

codon_start 1

transl_table 11

product hypothetical protein

33672 35129 gene

gene gp46

33672 35129 CDS

gene gp46

codon_start 1

transl_table 11

product portal protein

35130 36404 gene

gene gp47

35130 36404 CDS

gene gp47

codon_start 1

transl_table 11

product large subunit terminase

36401 36871 gene

gene gp48

36401 36871 CDS

gene gp48

codon_start 1

transl_table 11

product terminase small subunit

37184 37774 gene

gene gp49

37184 37774 CDS

gene gp49

codon_start 1

transl_table 11

product hypothetical protein

37786 38271 gene

gene gp50

37786 38271 CDS

gene gp50

codon_start 1

transl_table 11

product RusA family crossover junction endodeoxyribonuclease

38253 38423 gene

gene gp51

38253 38423 CDS

gene gp51

codon_start 1

transl_table 11

product hypothetical protein

38420 38593 gene

gene gp52

38420 38593 CDS

gene gp52

codon_start 1

transl_table 11

product hypothetical protein

38590 39051 gene

gene gp53

38590 39051 CDS

gene gp53

codon_start 1

transl_table 11

product hypothetical protein

39048 40022 gene

gene gp54

39048 40022 CDS

gene gp54

codon_start 1

transl_table 11

product hypothetical protein

40087 40374 gene

gene gp55

40087 40374 CDS

gene gp55

codon_start 1

transl_table 11

product hypothetical protein

40448 40855 gene

gene gp56

40448 40855 CDS

gene gp56

codon_start 1

transl_table 11

product hypothetical protein

40990 41304 gene

gene gp57

40990 41304 CDS

gene gp57

codon_start 1

transl_table 11

product antitoxin of bacterial toxin-antitox

41347 42144 gene

gene gp58

41347 42144 CDS

gene gp58

codon_start 1

transl_table 11

product repressor protein C

42152 42484 gene

gene gp59

42152 42484 CDS

gene gp59

codon_start 1

transl_table 11

product hypothetical protein

43079 43522 gene

gene gp60

43079 43522 CDS

gene gp60

codon_start 1

transl_table 11

product hypothetical protein

43571 43894 gene

gene gp61

43571 43894 CDS

gene gp61

codon_start 1

transl_table 11

product hypothetical protein

43921 44142 gene

gene gp62

43921 44142 CDS

gene gp62

codon_start 1

transl_table 11

product hypothetical protein

44139 44366 gene

gene gp63

44139 44366 CDS

gene gp63

codon_start 1

transl_table 11

product hypothetical protein

44363 44521 gene

gene gp64

44363 44521 CDS

gene gp64

codon_start 1

transl_table 11

product hypothetical protein

44694 45131 gene

gene gp65

44694 45131 CDS

gene gp65

codon_start 1

transl_table 11

product hypothetical protein

45128 45412 gene

gene gp66

45128 45412 CDS

gene gp66

codon_start 1

transl_table 11

product hypothetical protein

45454 46494 gene

gene gp67

45454 46494 CDS

gene gp67

codon_start 1

transl_table 11

product RecT protein-like protein

46491 47111 gene

gene gp68

46491 47111 CDS

gene gp68

codon_start 1

transl_table 11

product exonuclease

47068 47874 gene

gene gp69

47068 47874 CDS

gene gp69

codon_start 1

transl_table 11

product hypothetical protein
